# Supplementary material for: Gram scale production of 1-azido-β-d-glucose via enzyme catalysis for the synthesis of 1,2,3-triazole-glucosides
Source: Royal Society of Chemistry journal article supplement (doi:10.1039/c9ra00736a), 2019-01-01
Supplement: c9ra00736a1.pdf [file c9ra00736a1.pdf]

## Supporting Information

Gram scale production of 1-azido- $\beta$ -D-glucose via enzyme catalysis for the synthesis of 1,2,3-triazole-glucosides

Jaggiah N. Gorantla,<sup>1</sup> Salila Pengthaisong,<sup>1</sup> Sunaree Choknud,<sup>2</sup> Teadkai Kaewpuang,<sup>2</sup>

Tanaporn Manym,<sup>1</sup> Vinich Promarak,<sup>2</sup> James R. Ketudat Cairns\*.<sup>2</sup>

<sup>1</sup>School of Chemistry, Institute of Science, & Center for Biomolecular Structure, Function and Application, Suranaree University of Technology, Nakhon Ratchasima 30000, Thailand

<sup>2</sup>School of Molecular Science and Engineering, Vidyasirimedhi Institute of Science and Technology, Rayong, Thailand

\*Corresponding author:

Prof. James R. Ketudat Cairns, School of Chemistry, Institute of Science, & Center for Biomolecular Structure, Function and Application, Suranaree University of Technology, Nakhon Ratchasima 30000, Thailand

(Email: [cairns@sut.ac.th](mailto:cairns@sut.ac.th)), Phone: +66 44 224193; +66 83 1001112, Fax +66 44 224185

### *Table of Contents*

|                                                                                       |   |   |   |   |   |        |
|---------------------------------------------------------------------------------------|---|---|---|---|---|--------|
| 1. Figure S1. Reaction and first purification                                         | - | - | - | - | - | S2     |
| 2. Figure S2. Second purification                                                     | - | - | - | - | - | S3     |
| 3. Figure S3. <sup>1</sup> H-NMR spectra of compound <b>1</b> at 600 & 400 MHz-       | - | - | - | - | - | S3     |
| 4. Figure S4. NMR spectrum of compounds <b>1</b>                                      | - | - | - | - | - | S4     |
| 5. Figure S5. <sup>1</sup> H and <sup>13</sup> C NMR spectra of compounds <b>2-16</b> | - | - | - | - | - | S5-S34 |
| 6. Figure S6. HR-ESI-MS spectrum of compound <b>16</b>                                | - | - | - | - | - | S35    |

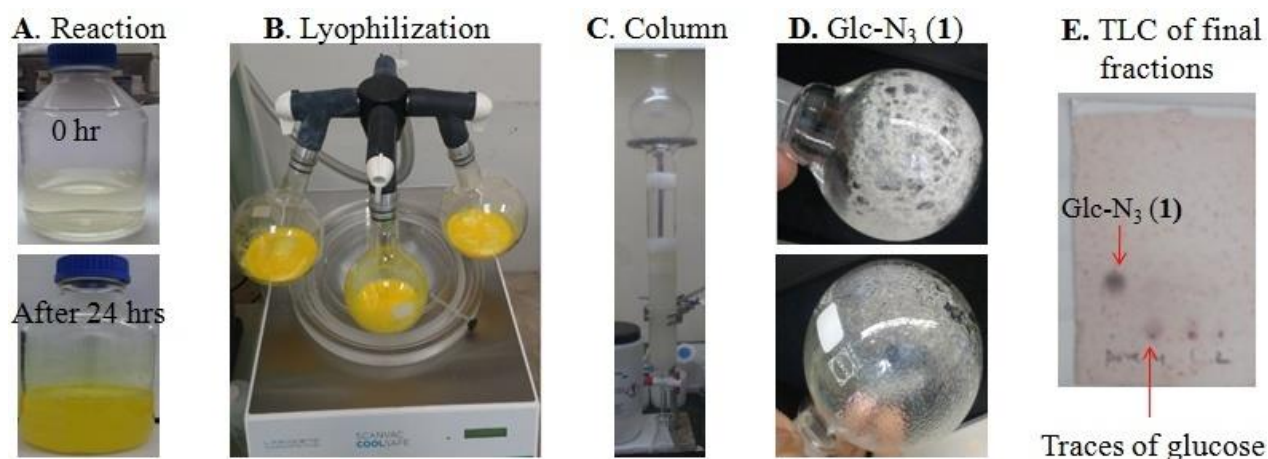

**Figure S1.** Reaction and first purification. (A). Transglucosylation reaction from 0 hr to 24 hrs, (B) H<sub>2</sub>O drying by lyophilization, (C) Silica gel column purification, (D) Glc-N<sub>3</sub> **1** [Impure (top), 800 mg pure (bottom)], (E) TLC profile of final fractions from silica gel column.

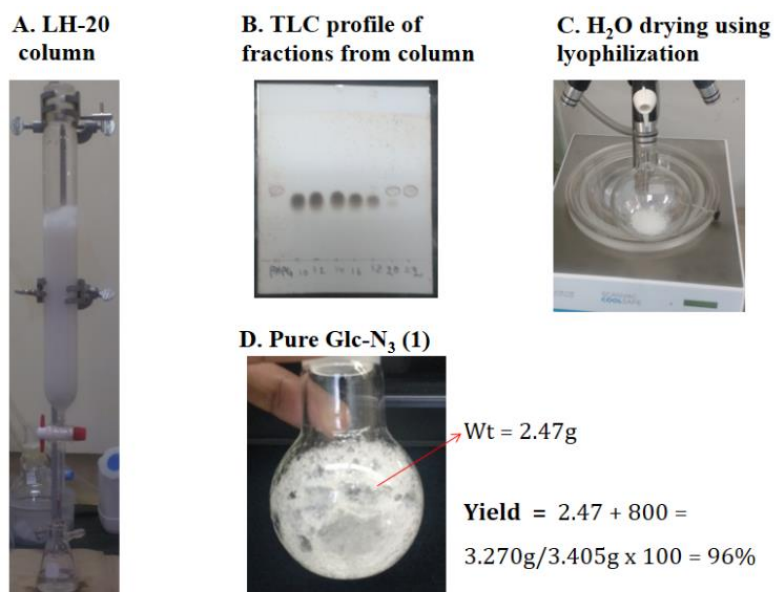

**Figure S2.** Second purification. (A). Sephadex LH-20 column (B) TLC profile of fractions from column (C) H<sub>2</sub>O drying using lyophilization (D) Pure 1-azido- $\beta$ -D-glucose (**1**).

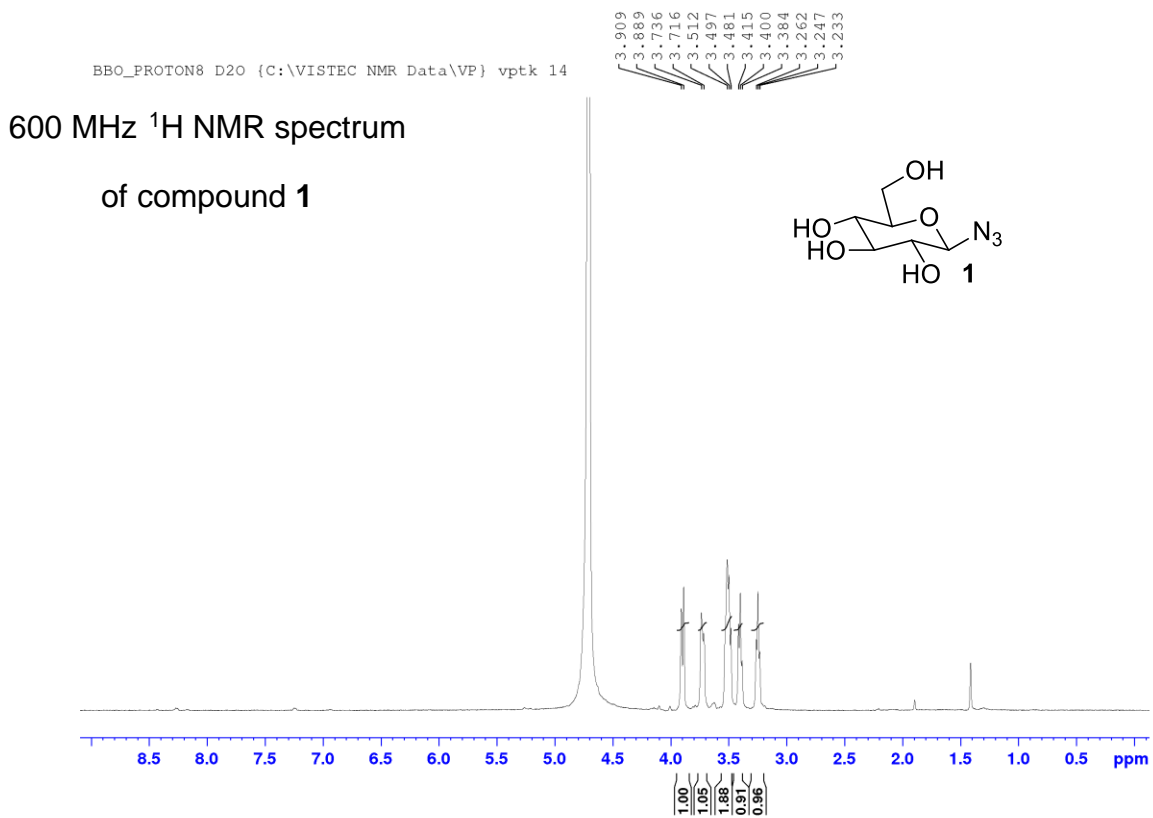

400 MHz <sup>1</sup>H NMR spectra of compound **1**

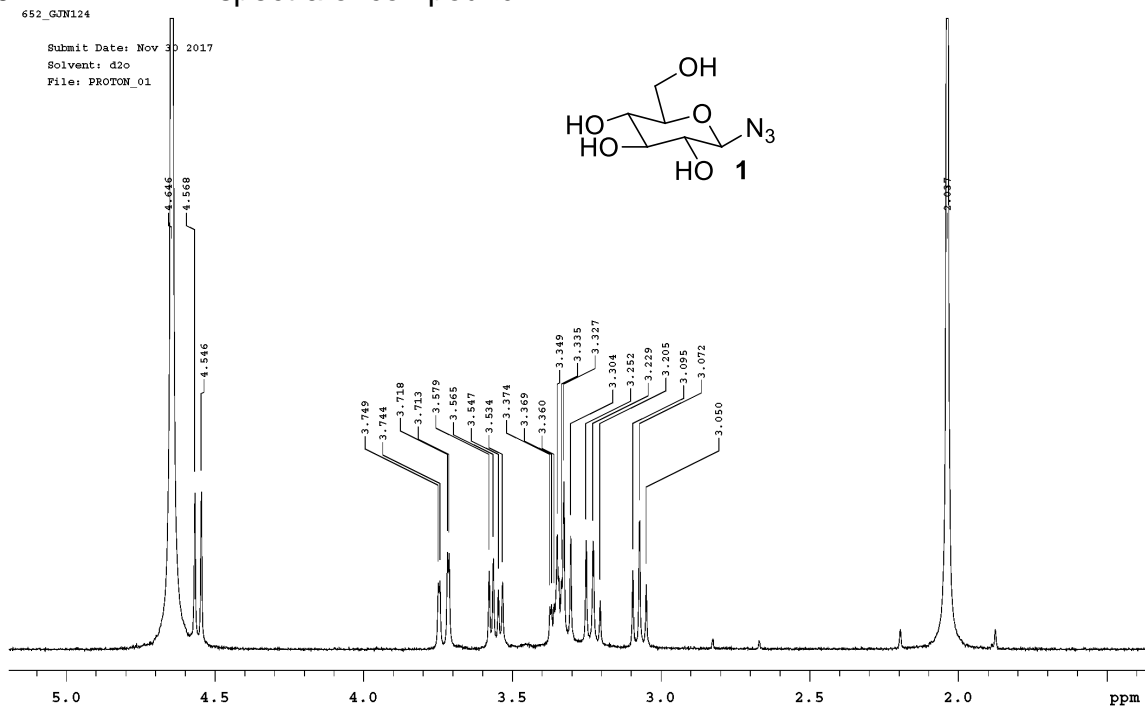

Figure S3. <sup>1</sup>H NMR Spectra of compound **1** at 600 and 400 MHz

BBO\_C13CPD256 D2O {C:\VISTEC NMR Data\VP} vptk 14

90.14  
77.94  
75.79  
72.88  
69.23  
60.60

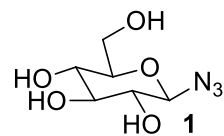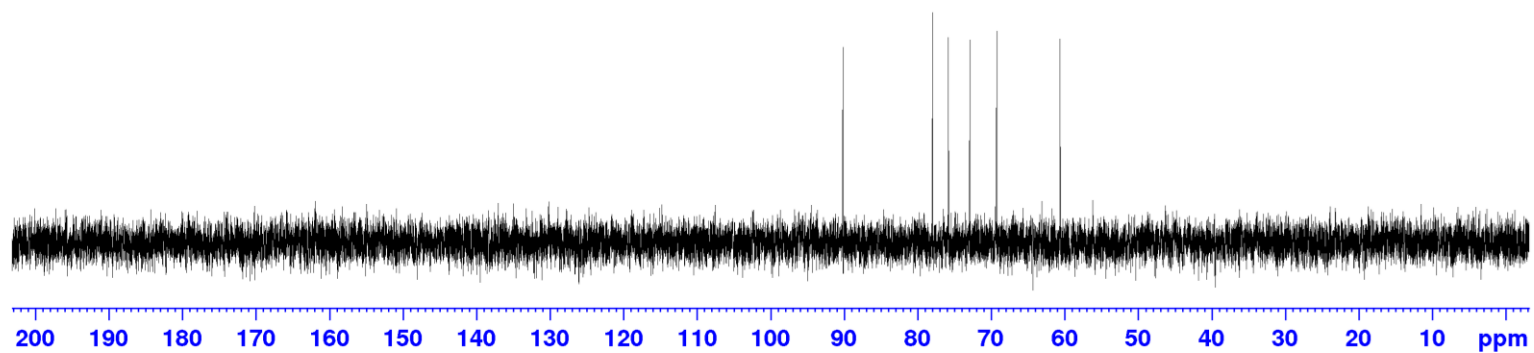

**Figure S4.**  $^{13}\text{C}$  NMR Spectrum of Compound **1**.

**Figure S5**  $^1\text{H}$  and  $^{13}\text{C}$  NMR Spectra of Compounds **2-16**.

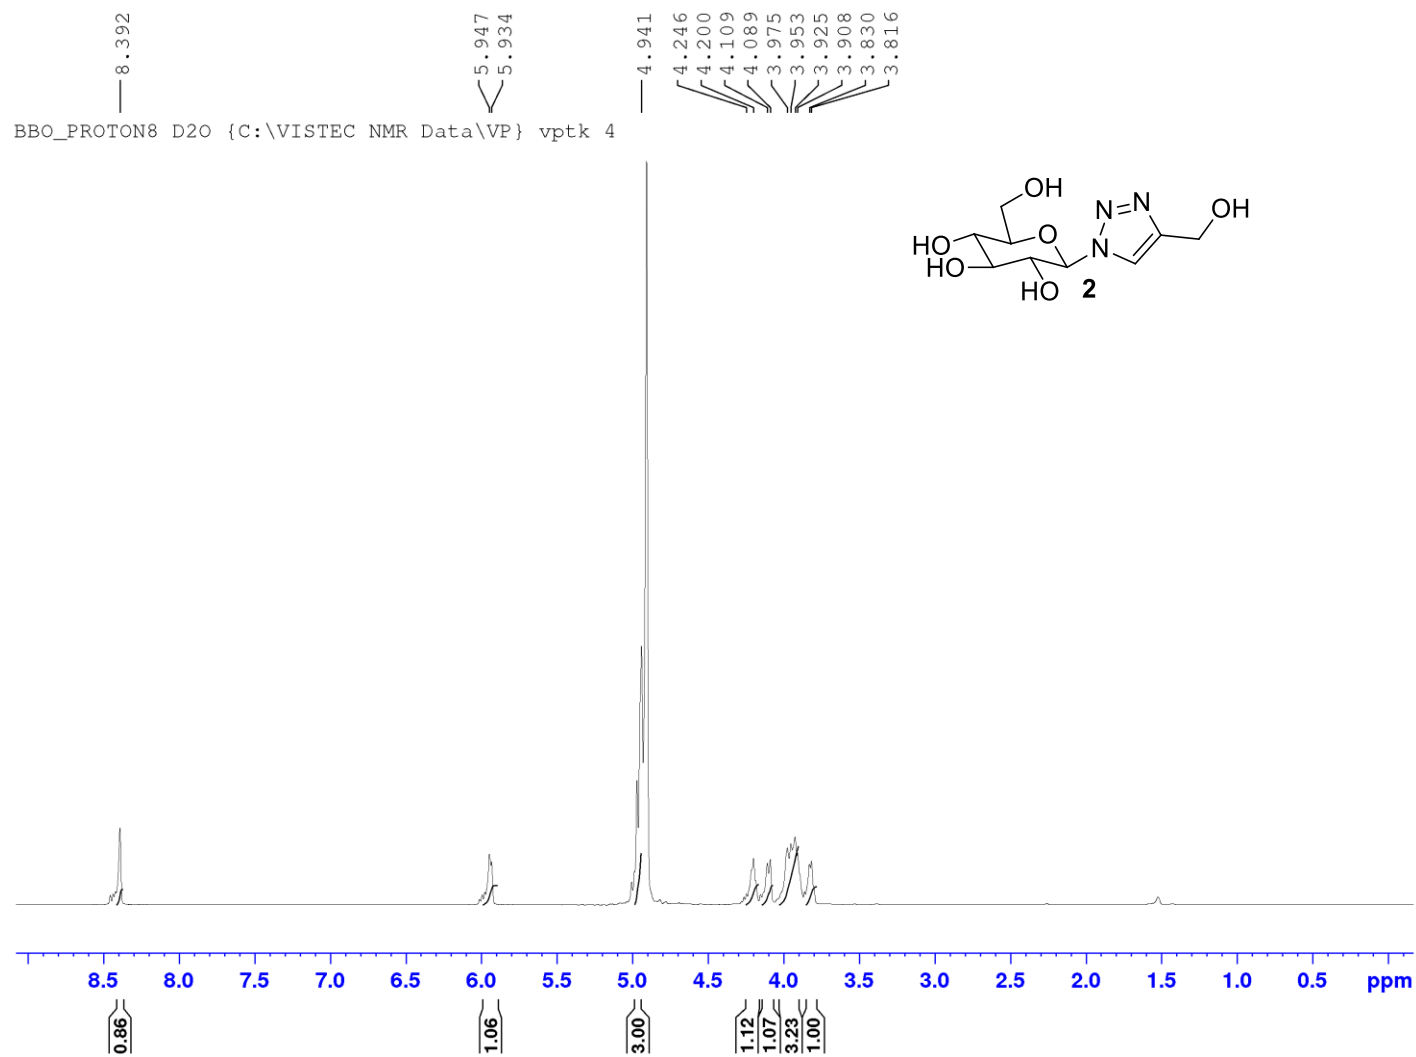

BBO\_C13CPD256 D2O {C:\VISTEC NMR Data\VP} vptk 4

147.27  
123.43  
87.51  
78.98  
76.03  
72.35  
69.08  
60.53  
54.71

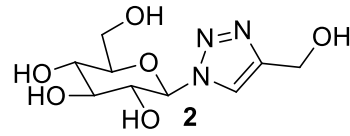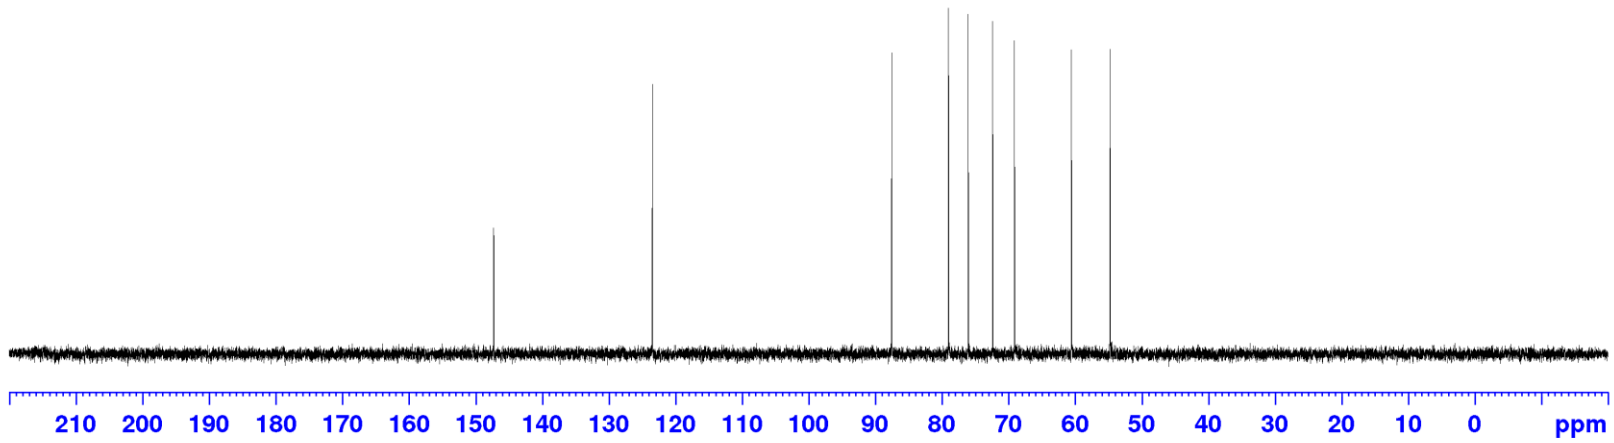

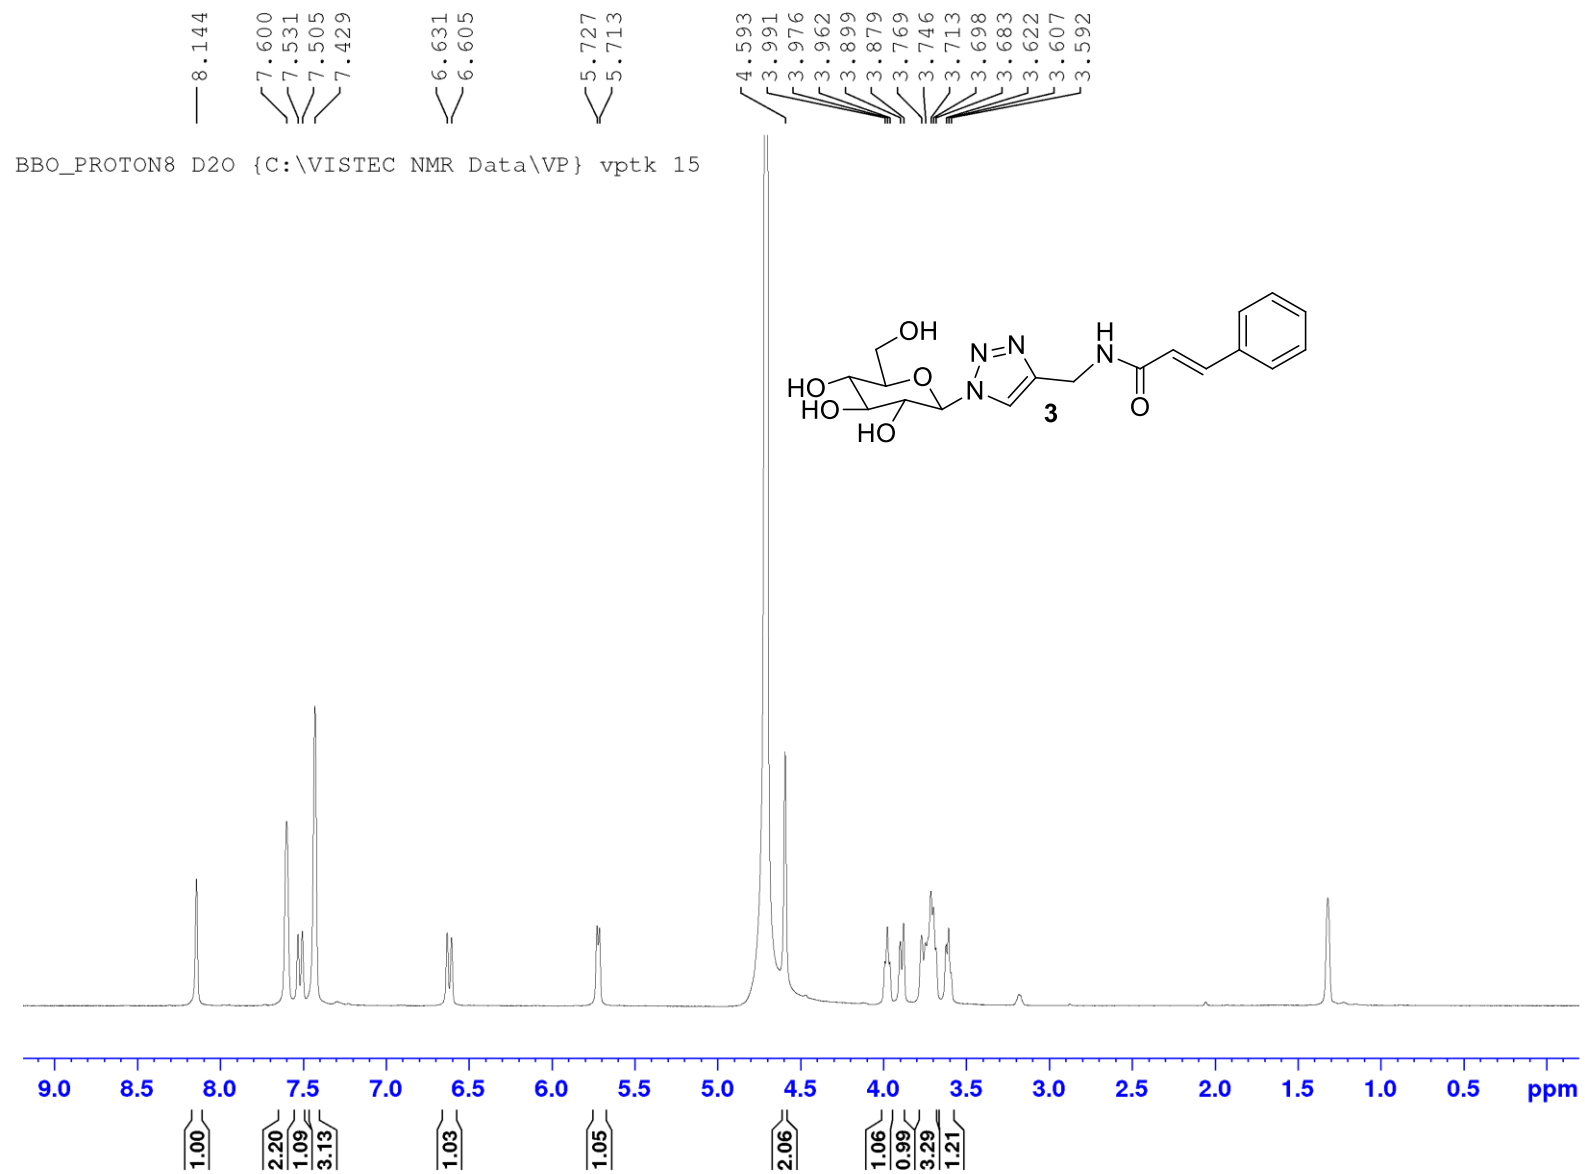

BBO\_C13CPD256 D2O {C:\VISTEC NMR Data\VP} vptk 3

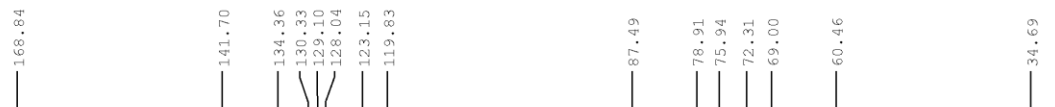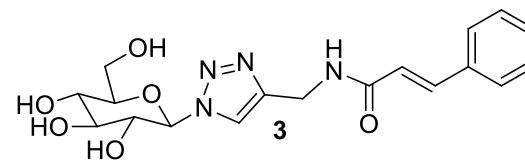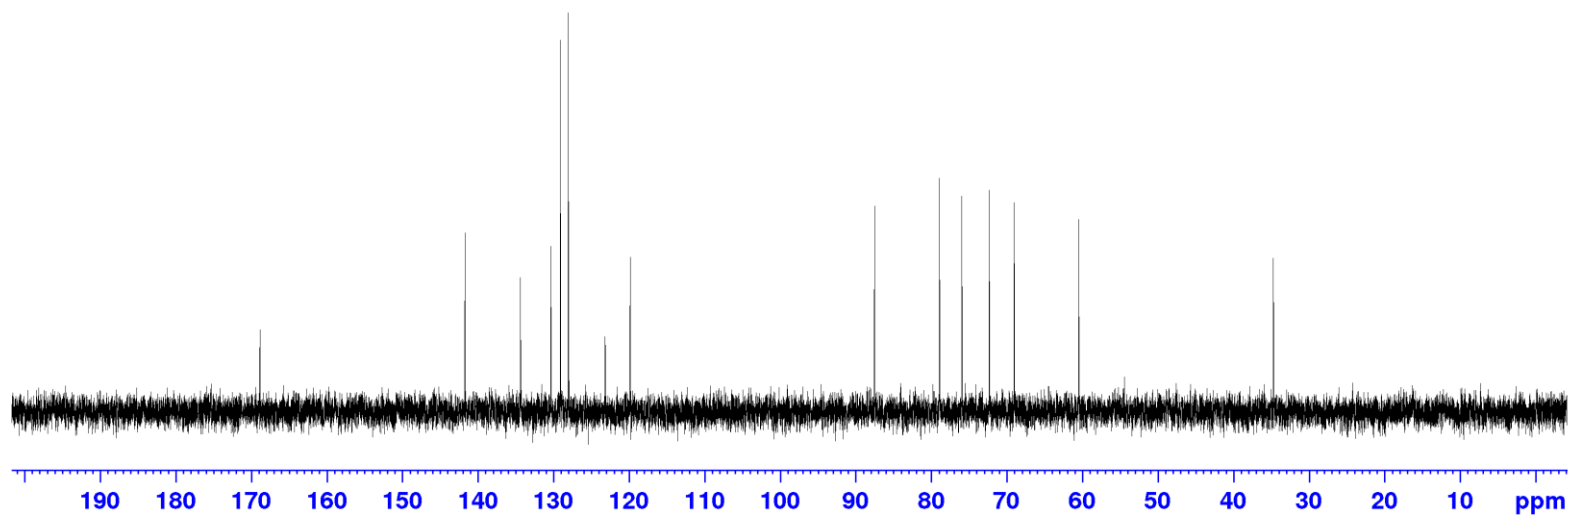



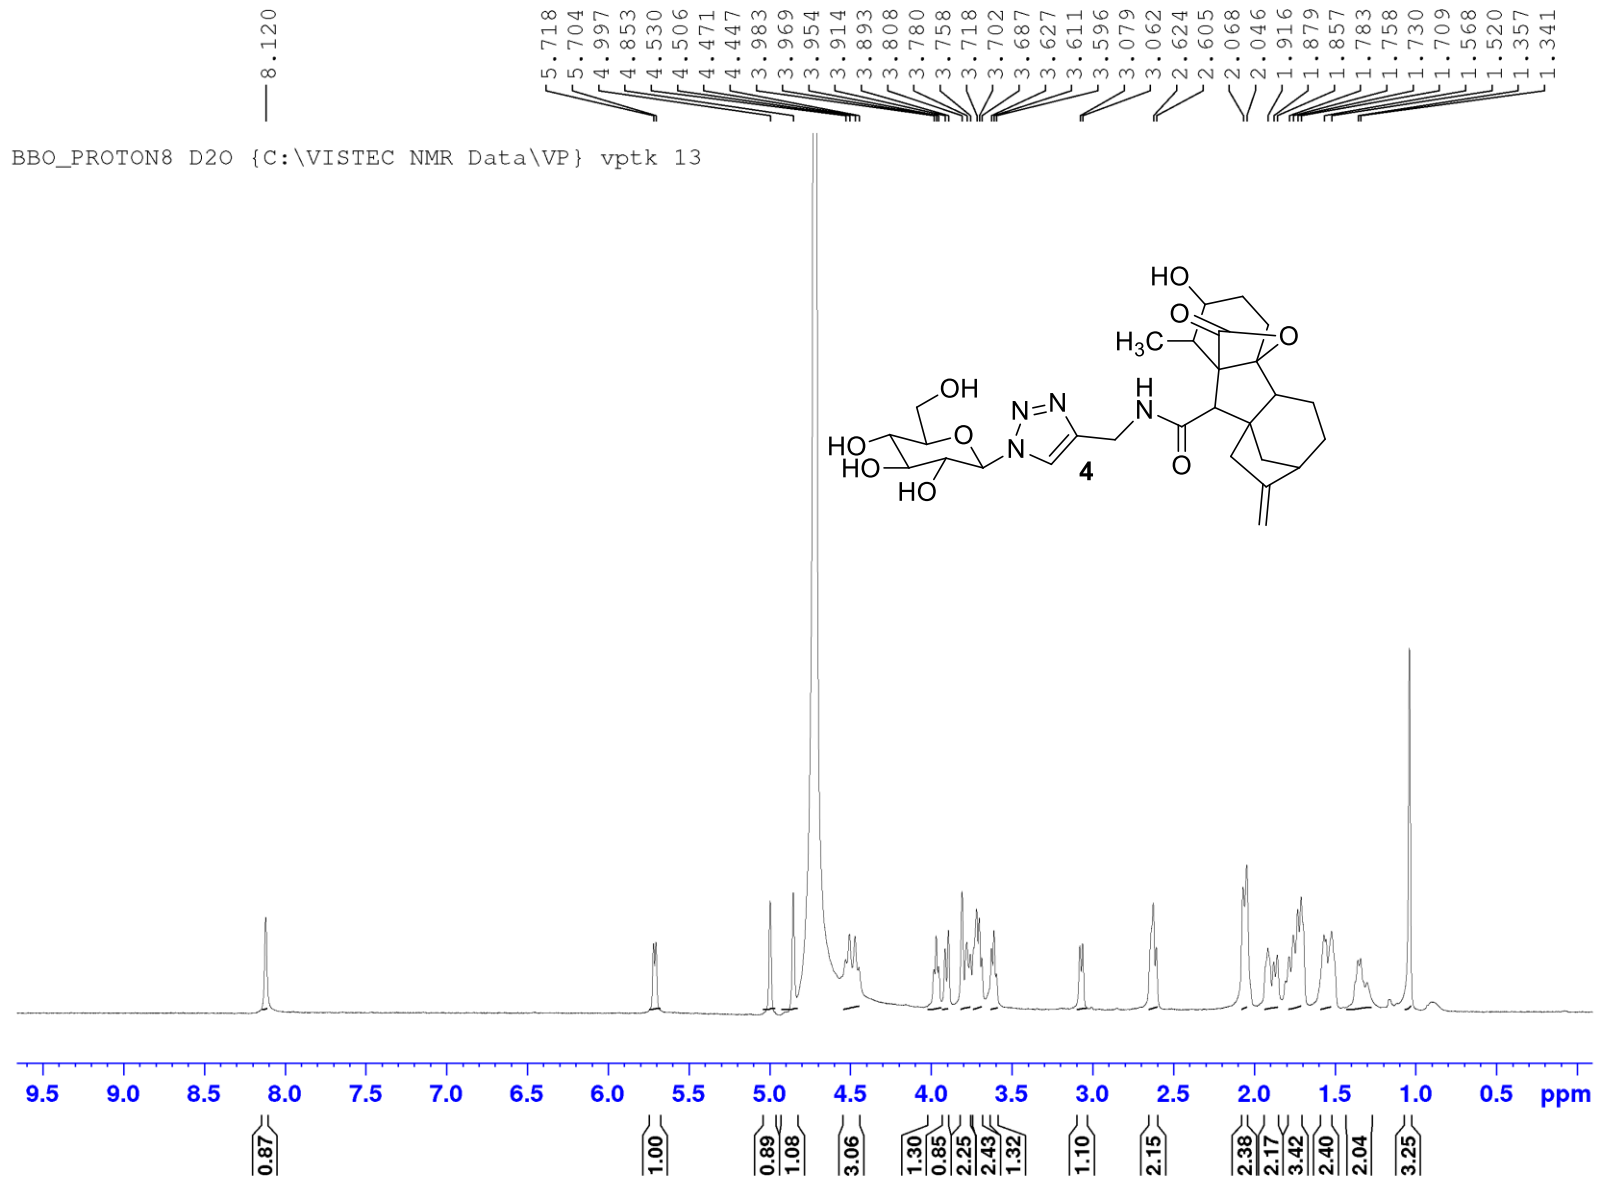

BBO\_C13CPD256 D2O {C:\VISTEC NMR Data\VP} vptk 1

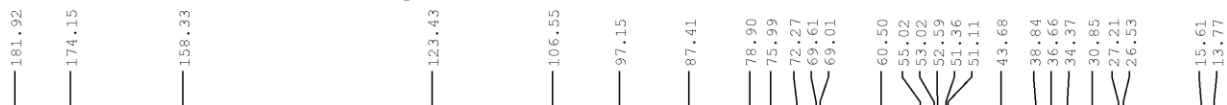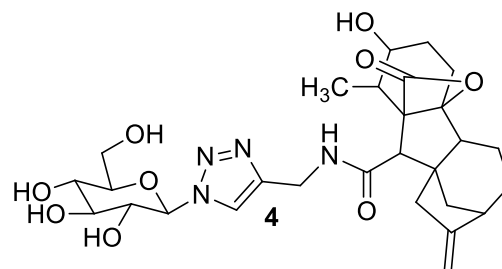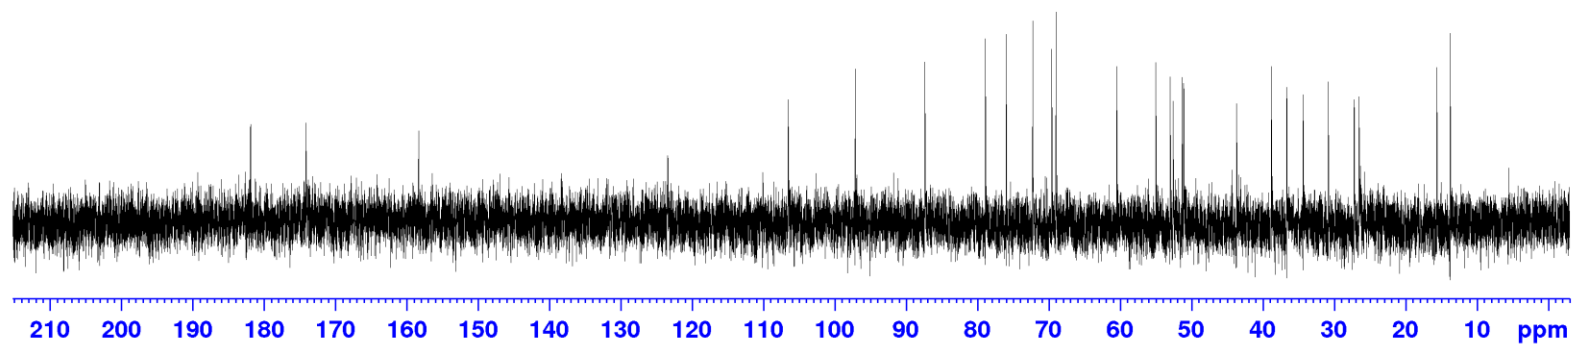

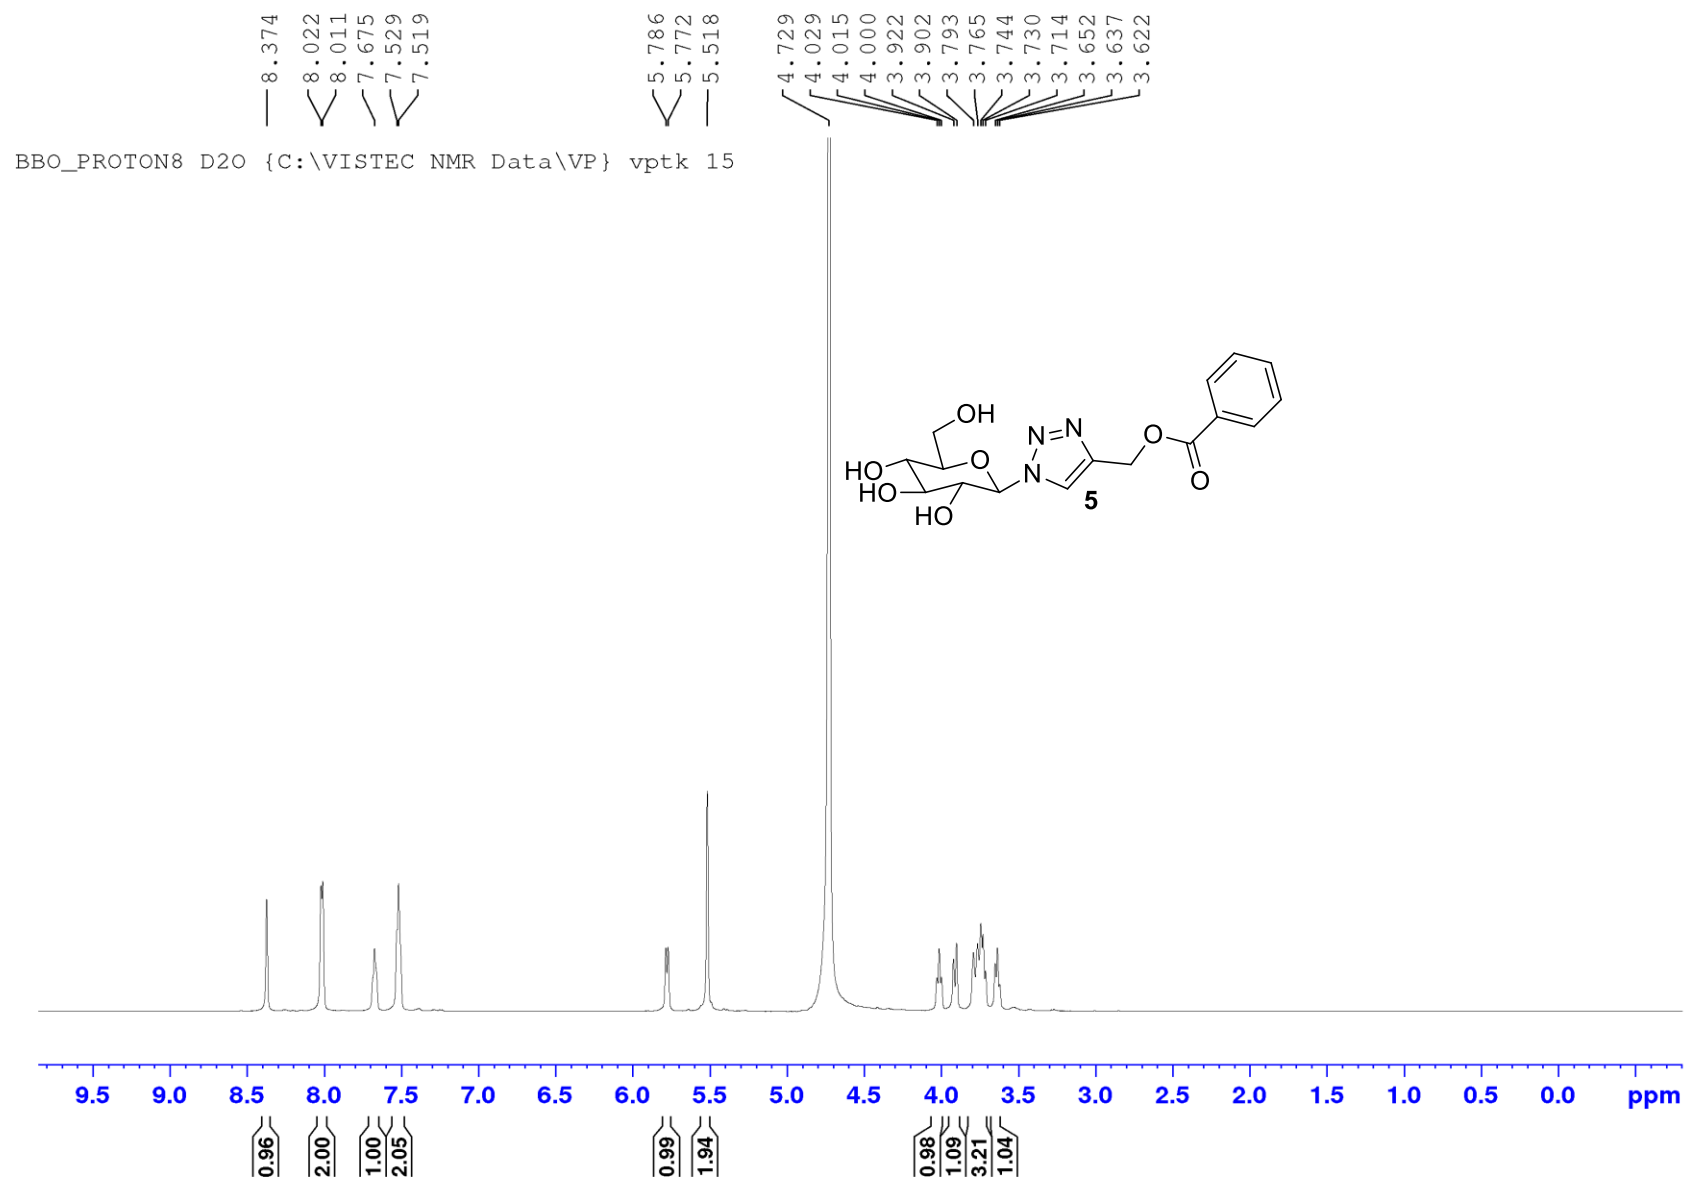

BBO\_C13CPD256 D2O {C:\VISTEC NMR Data\VP} vptk 15

168.28

134.06  
129.59  
129.06  
128.82  
125.04

87.61

78.98  
75.99  
72.38  
69.04

60.51  
57.91

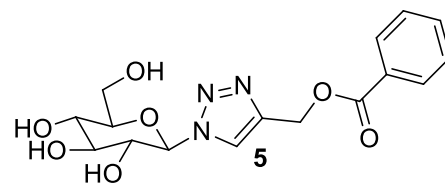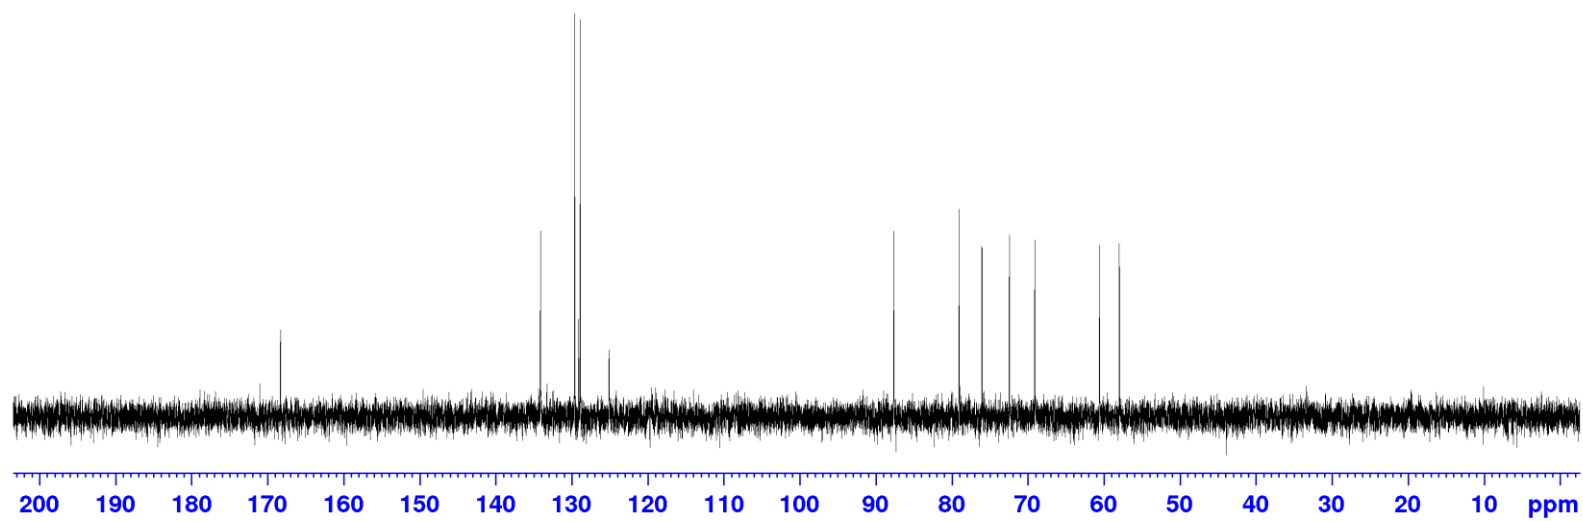

BBO\_PROTON8 D2O {C:\VISTEC NMR Data\VP} vptk 14

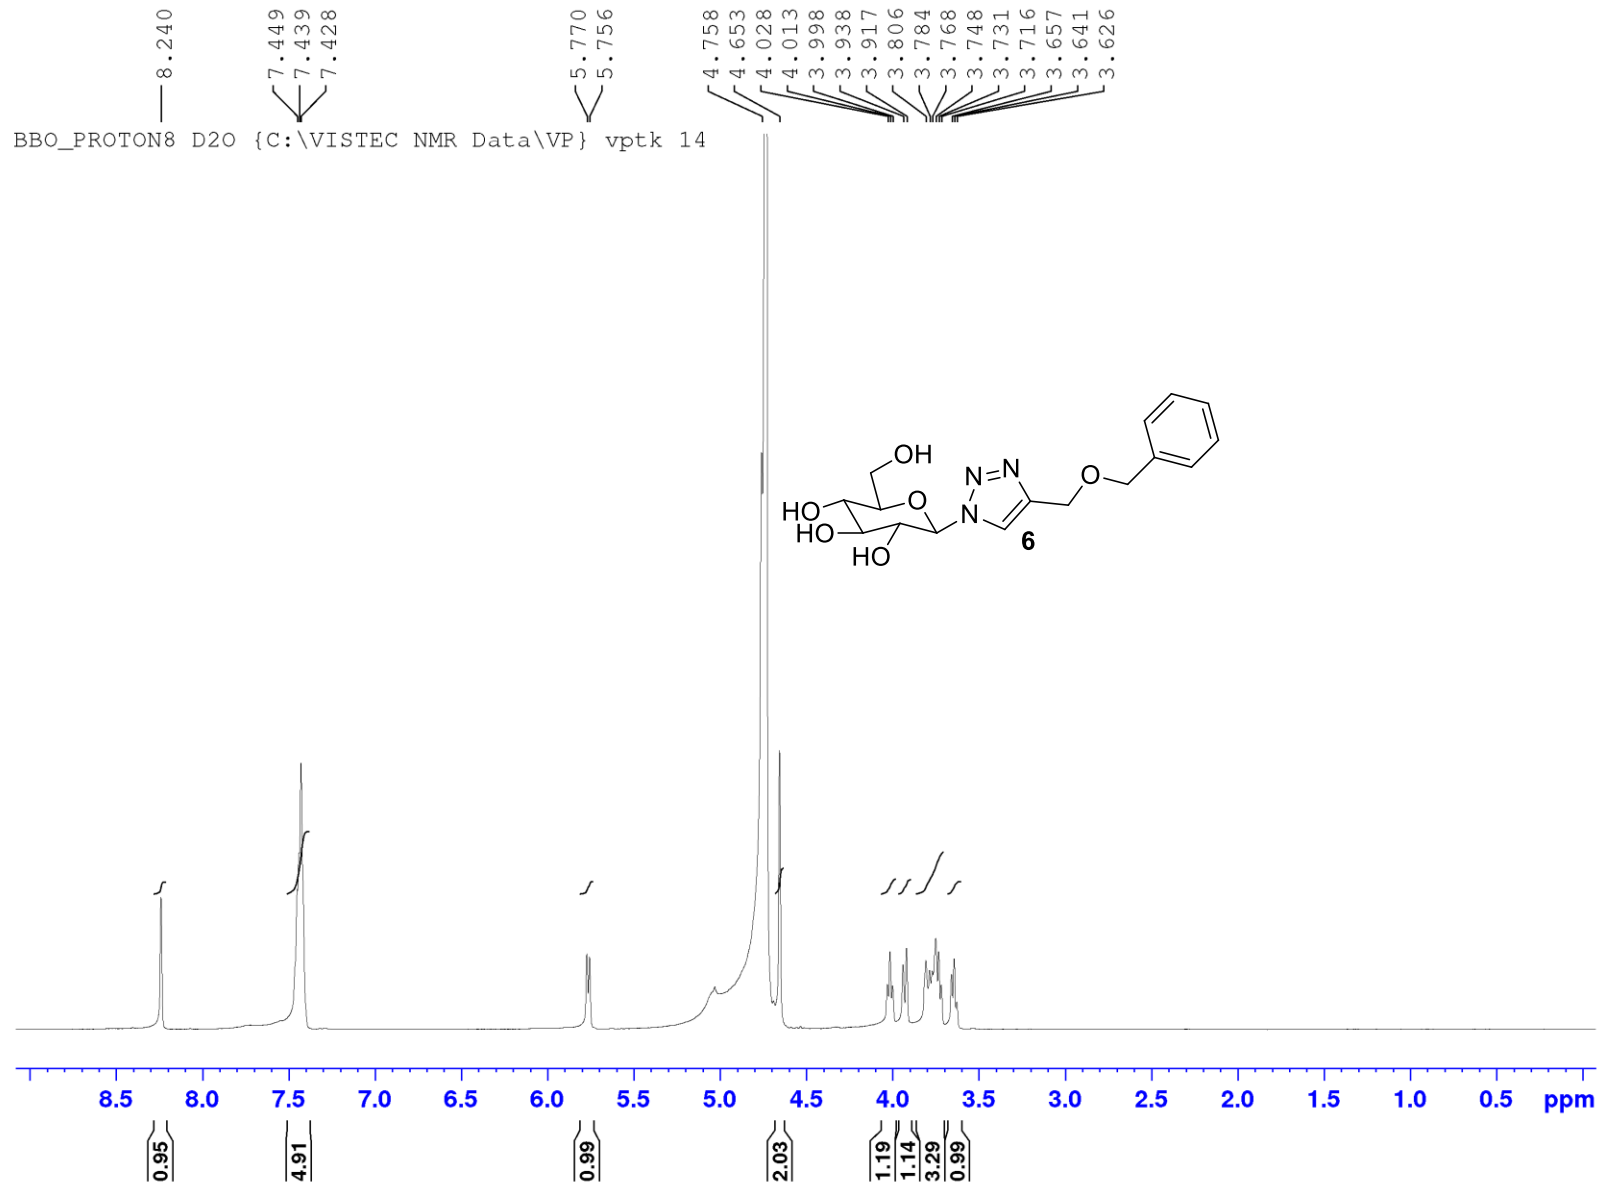

BBO\_C13CPD256 D2O {C:\VISTEC NMR Data\VP} vptk 14

136.97  
128.82  
128.70  
128.50  
124.54  
87.49  
78.94  
75.99  
72.37  
72.31  
69.02  
62.27  
60.49

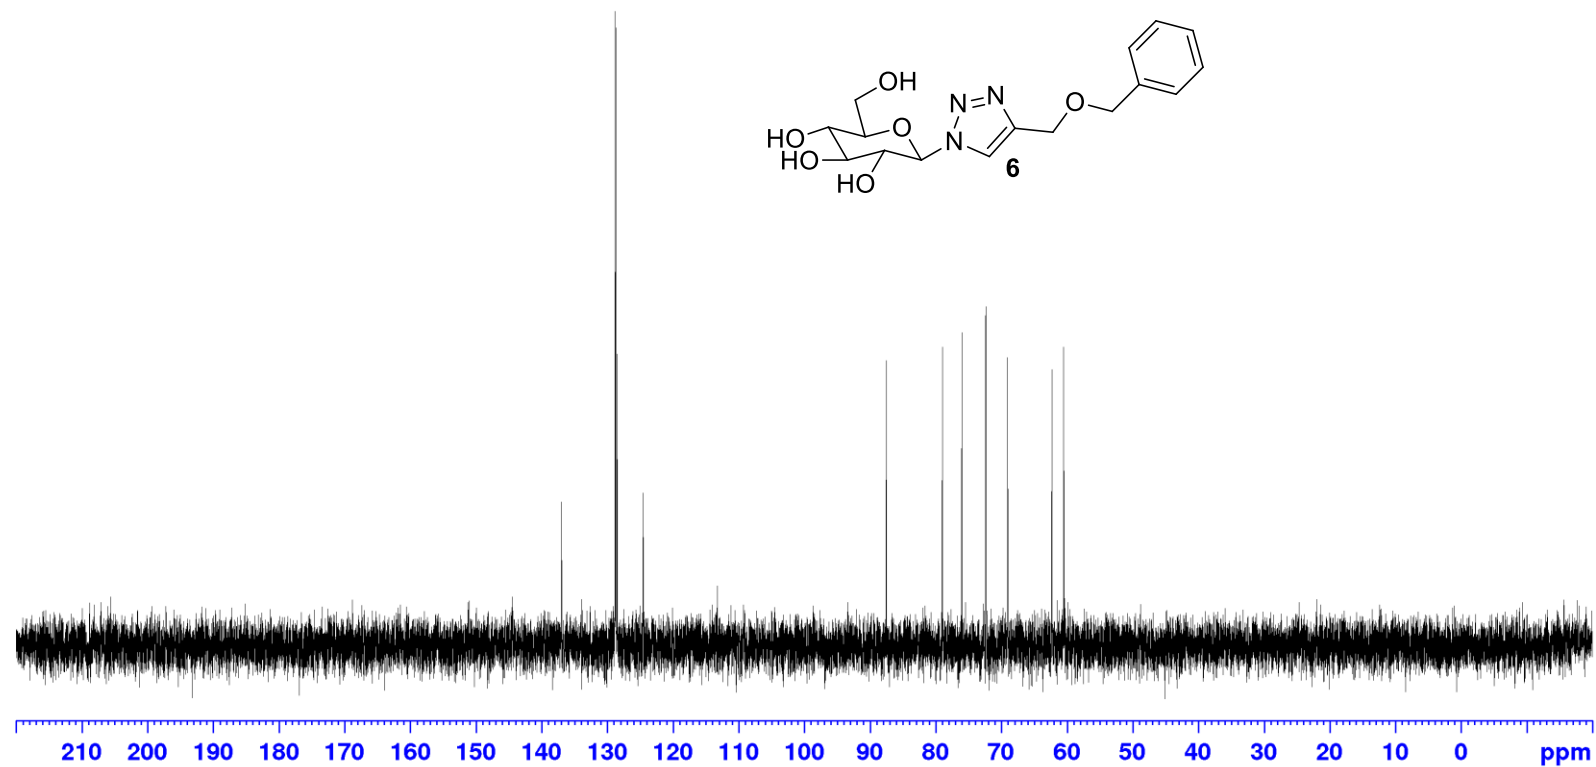

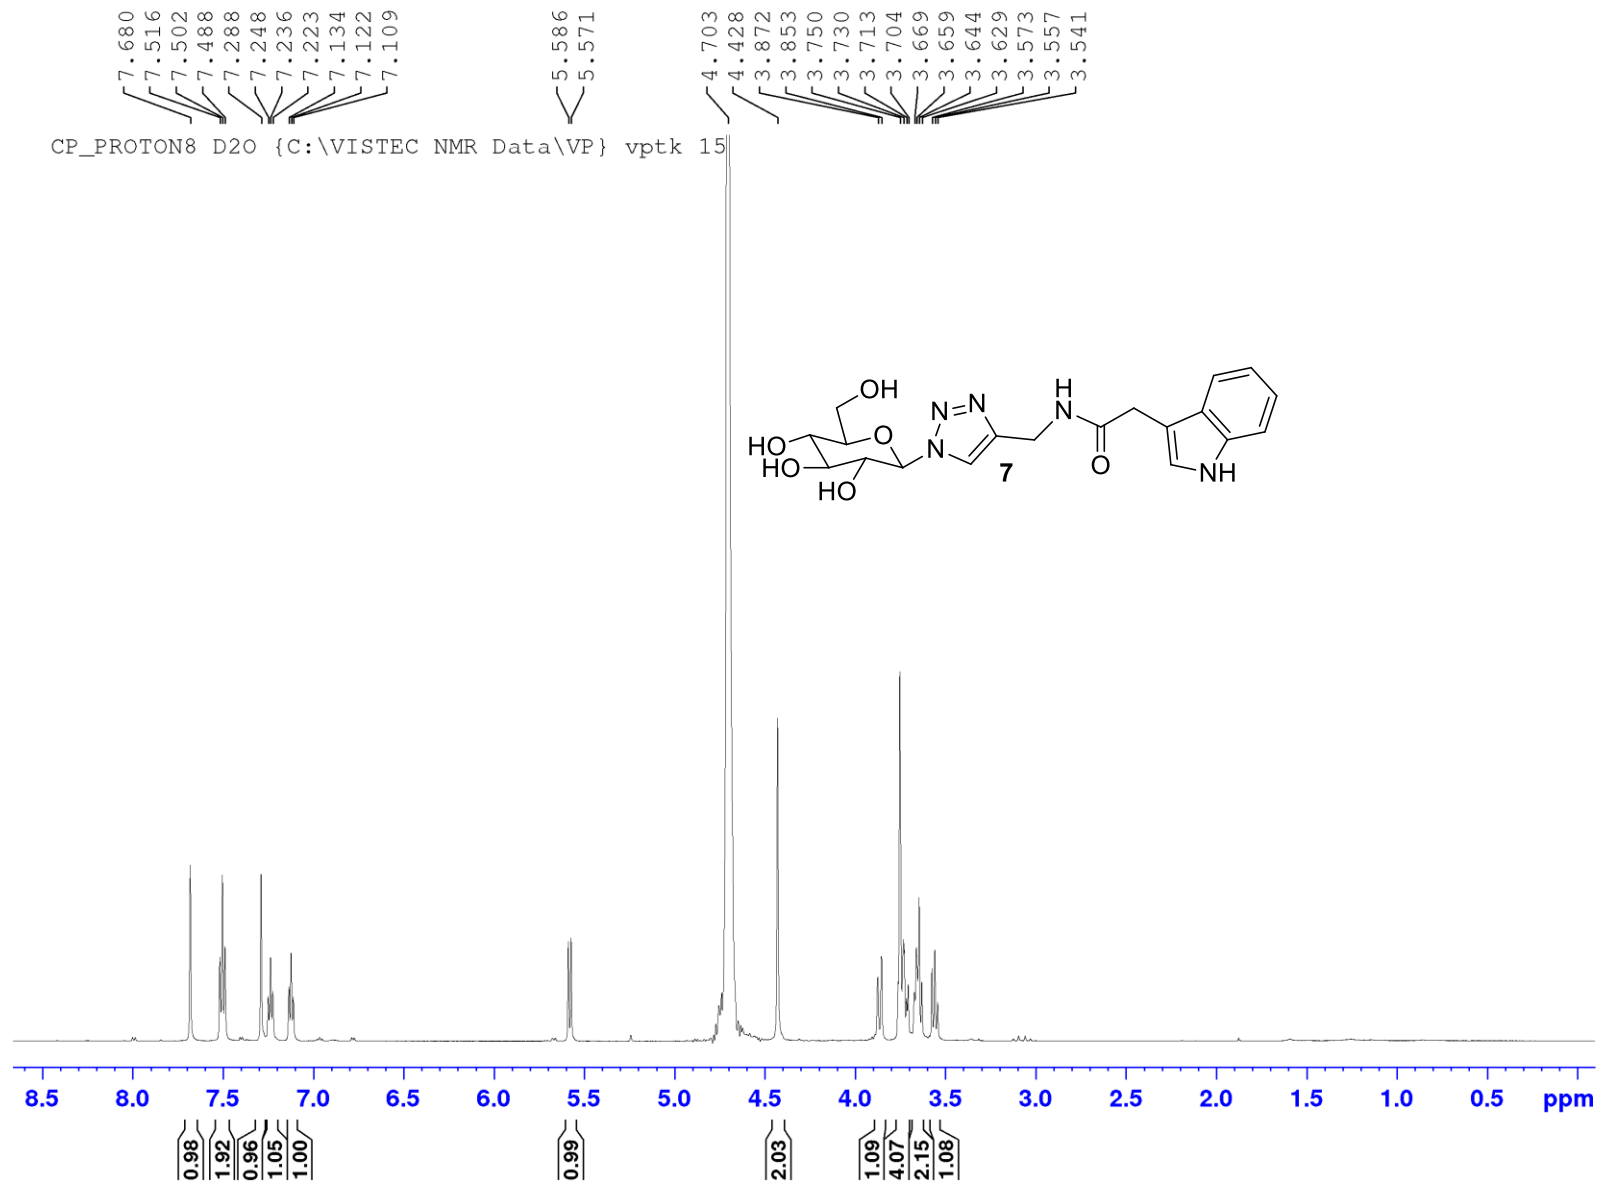

CP\_C13CPD32\_DE12 D2O {C:\VISTEC NMR Data\VP} vptk 6

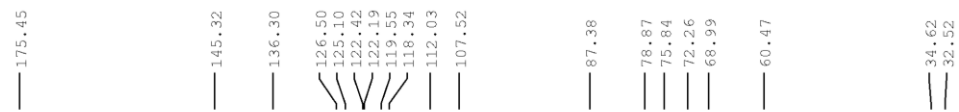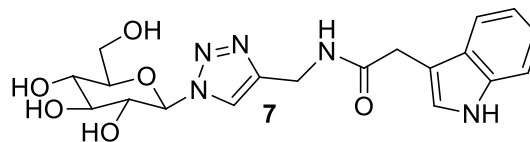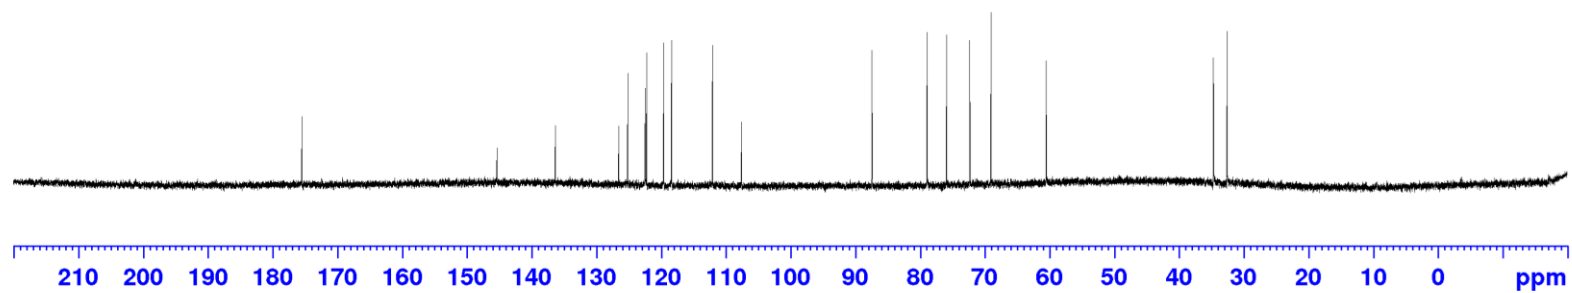



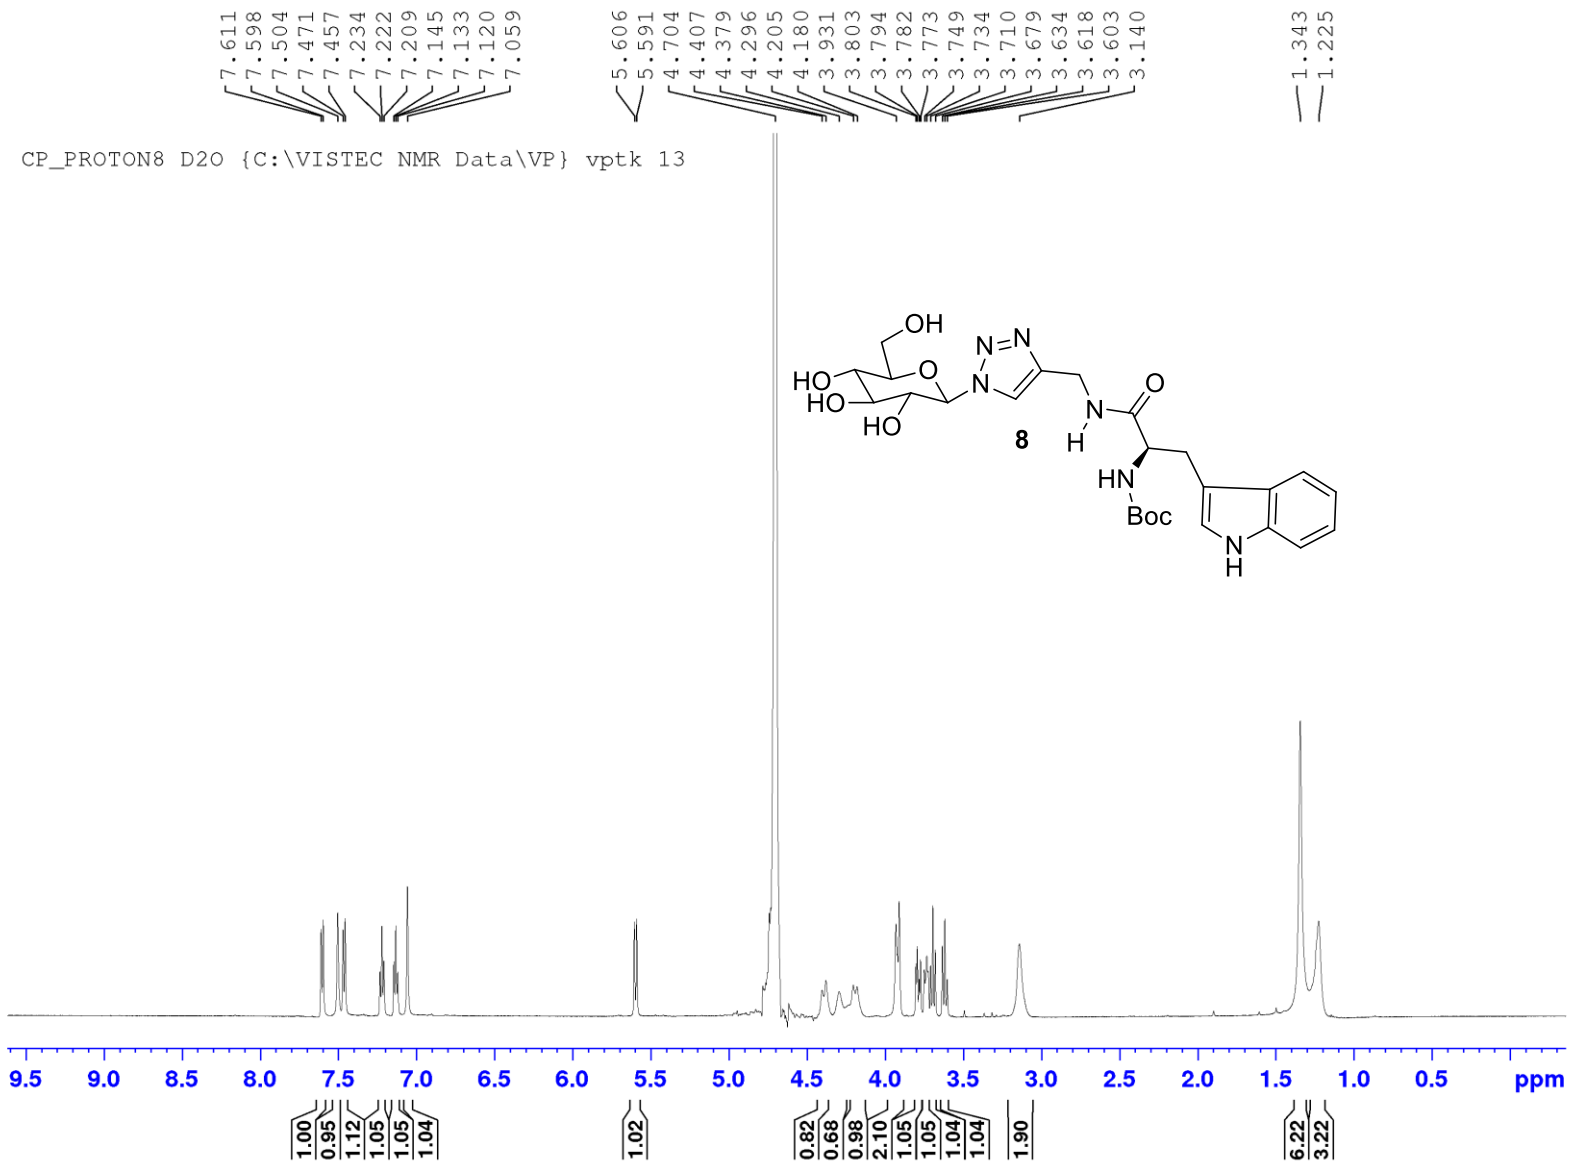

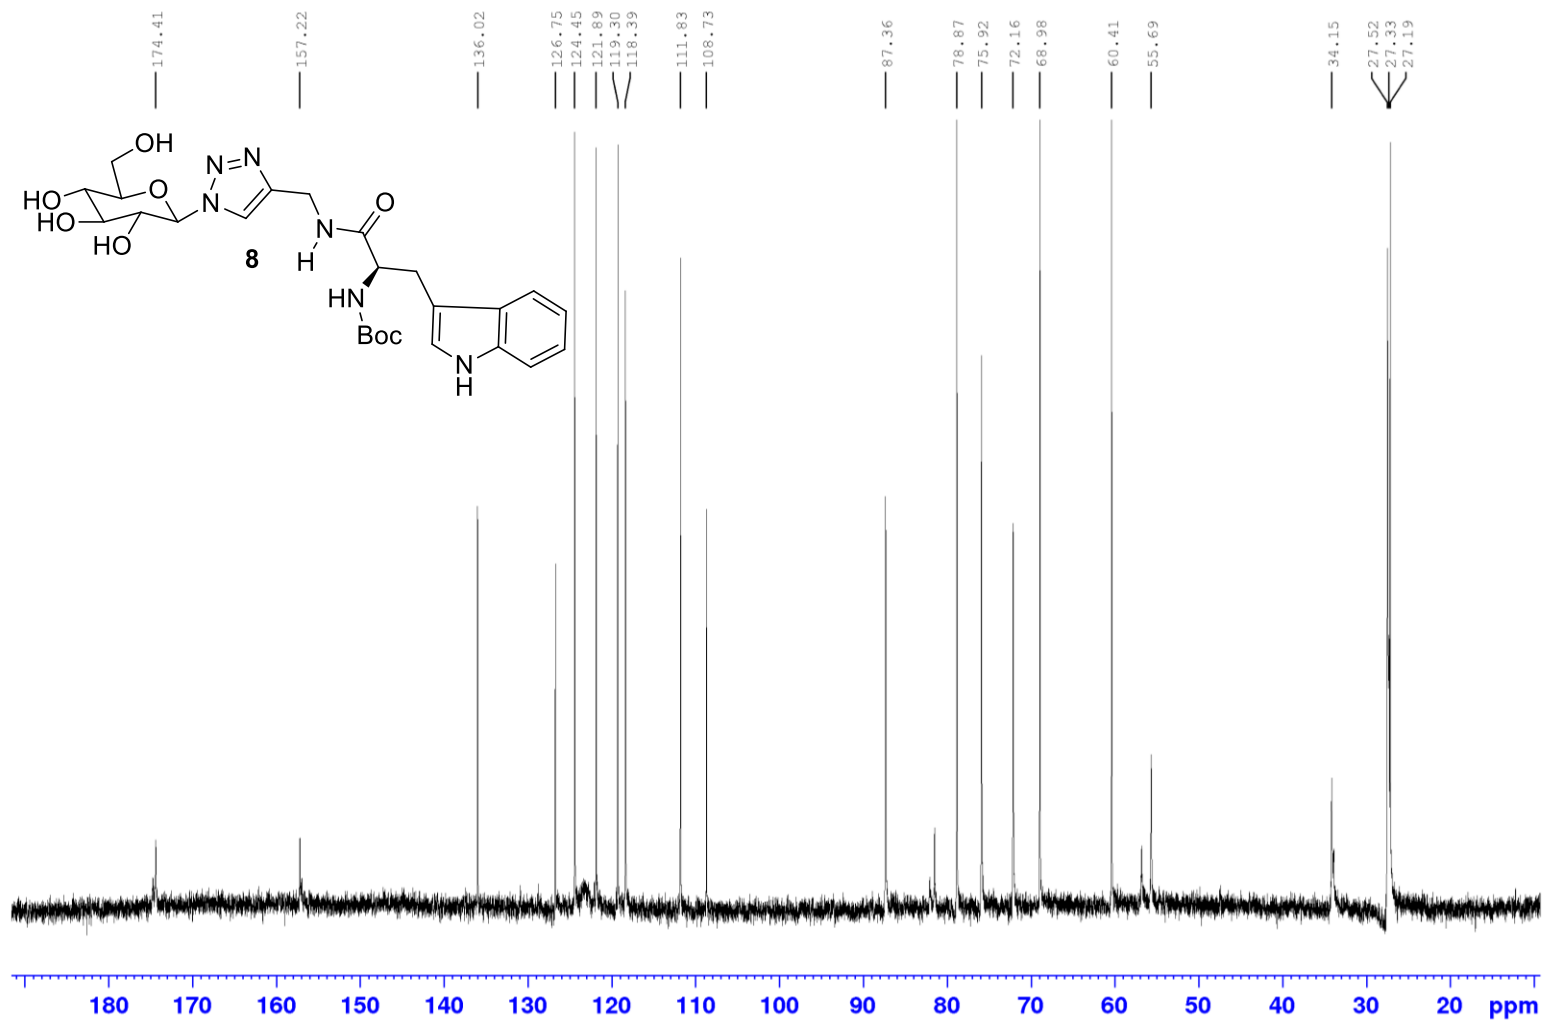

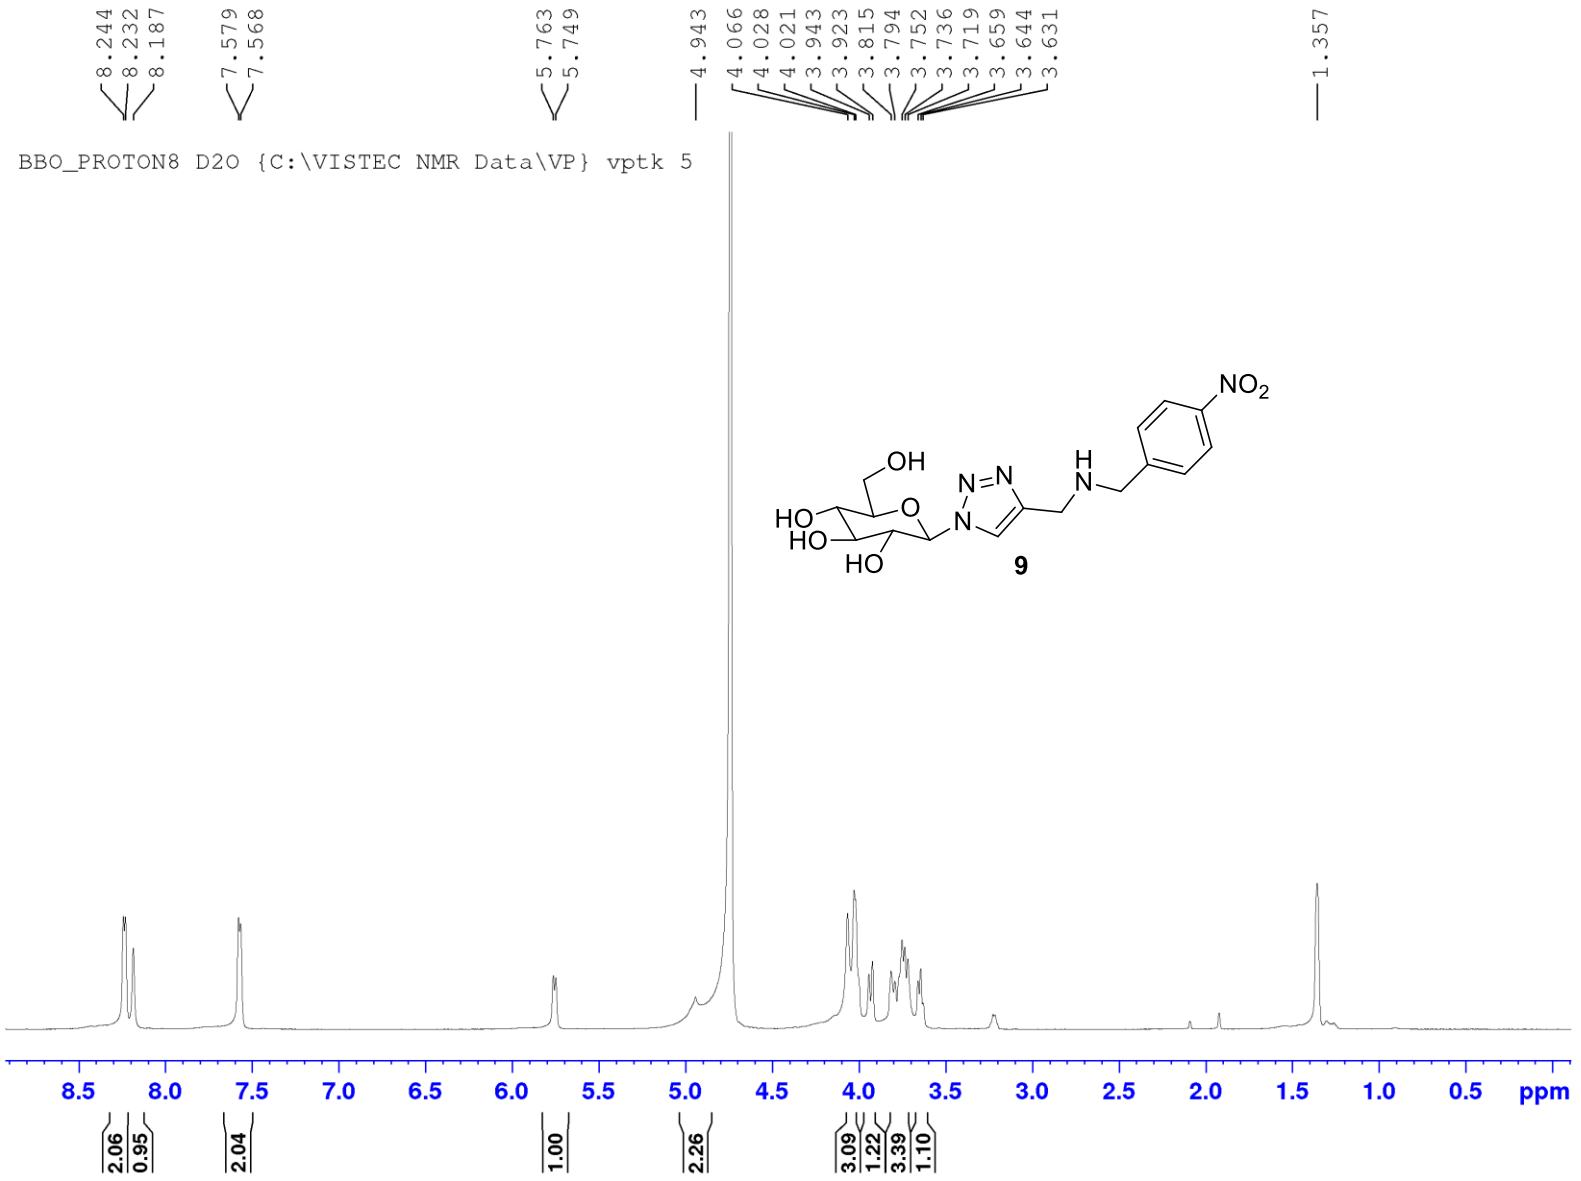

BBO\_C13CPD256 D2O {C:\VISTEC NMR Data\VP} vptk 5

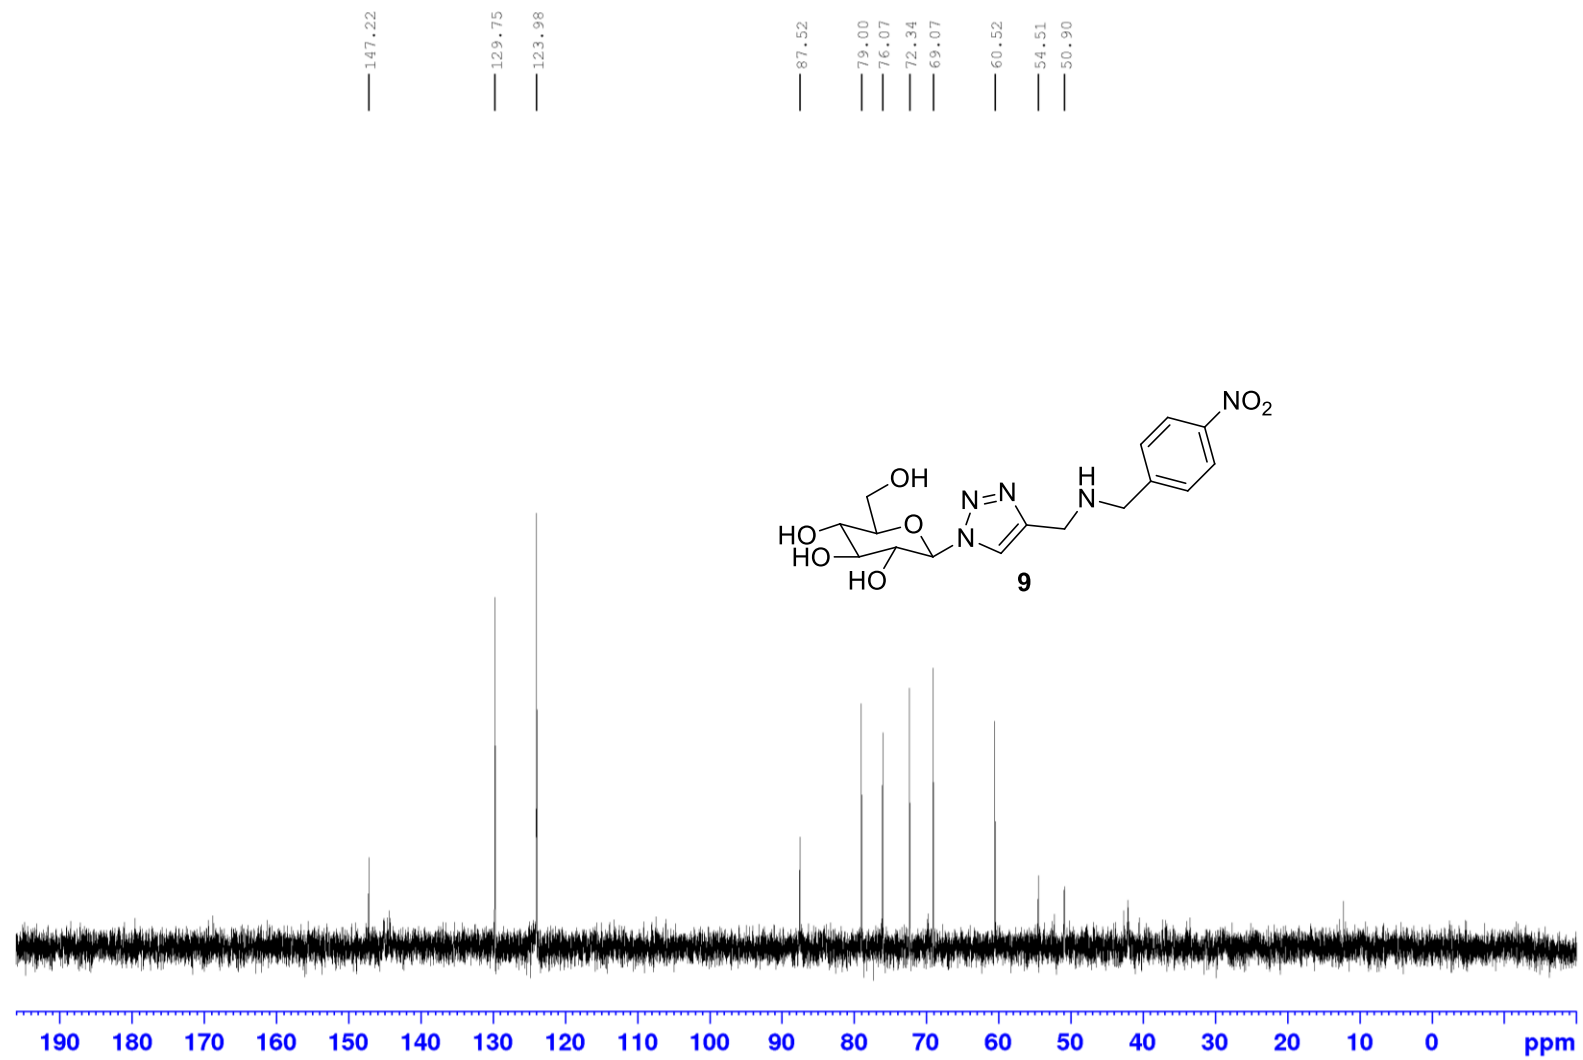

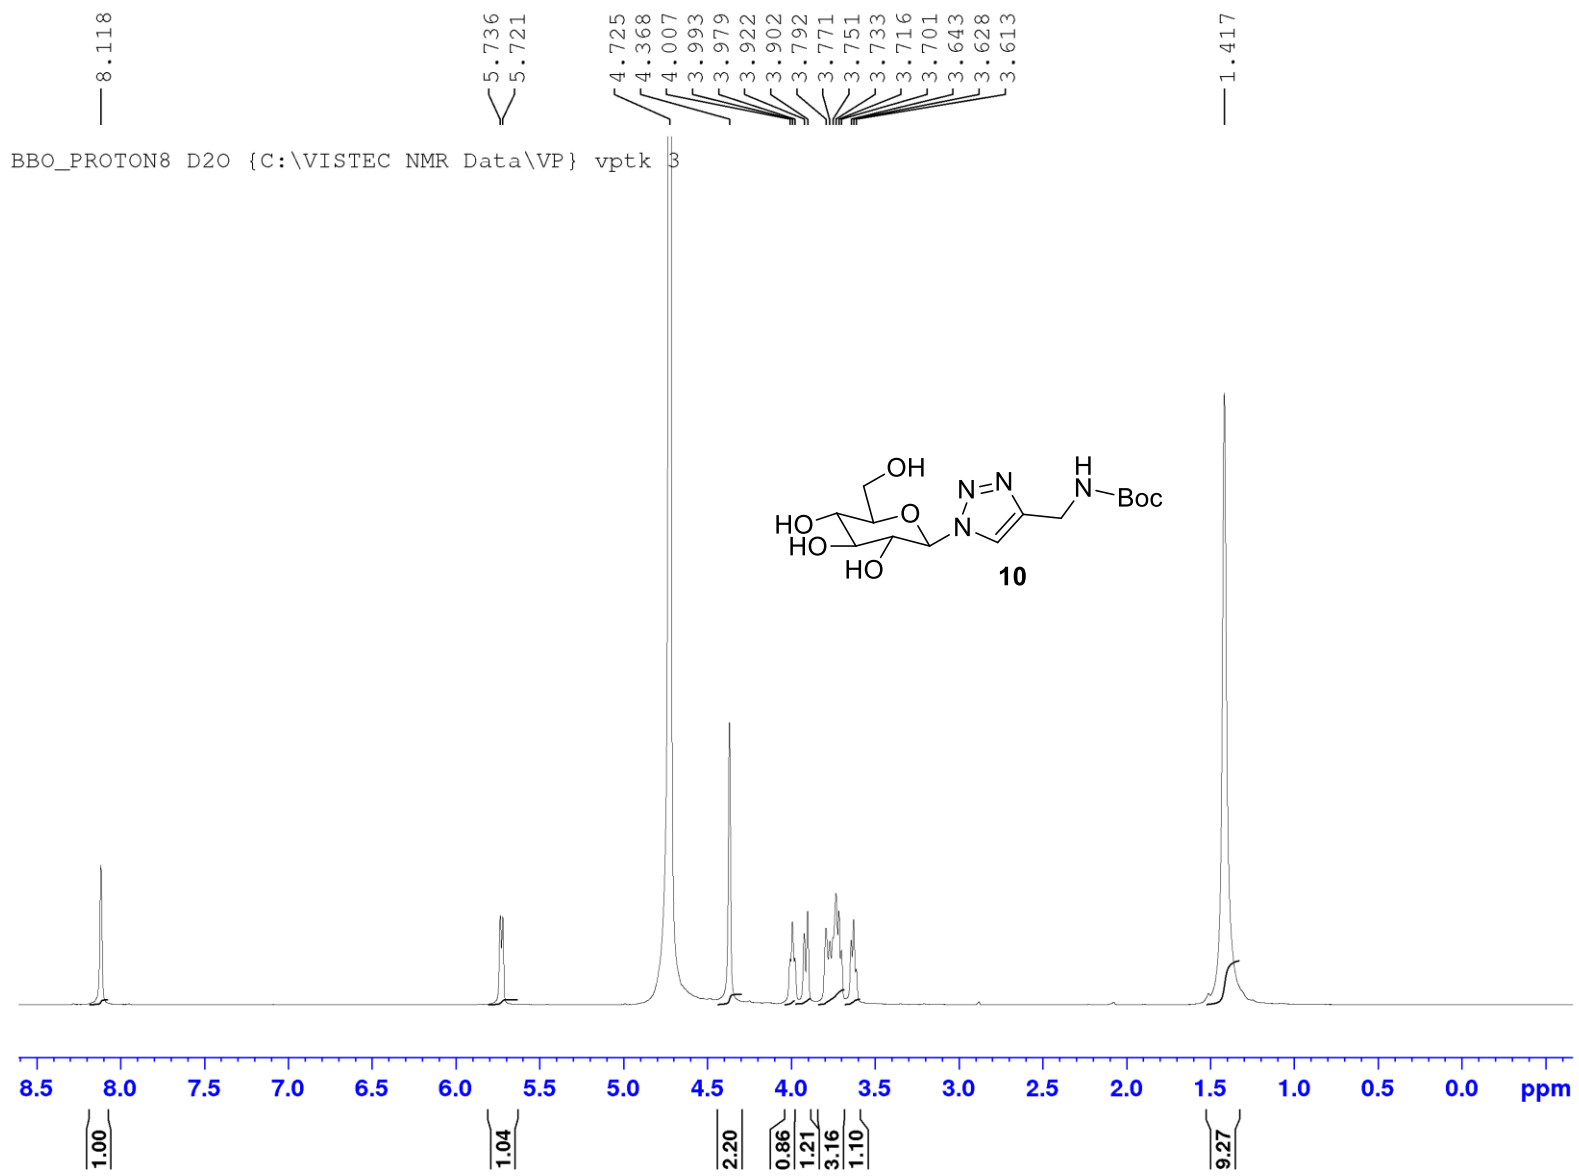

BBO\_C13CPD256 D2O {C:\VISTEC NMR Data\VP} vptk 5

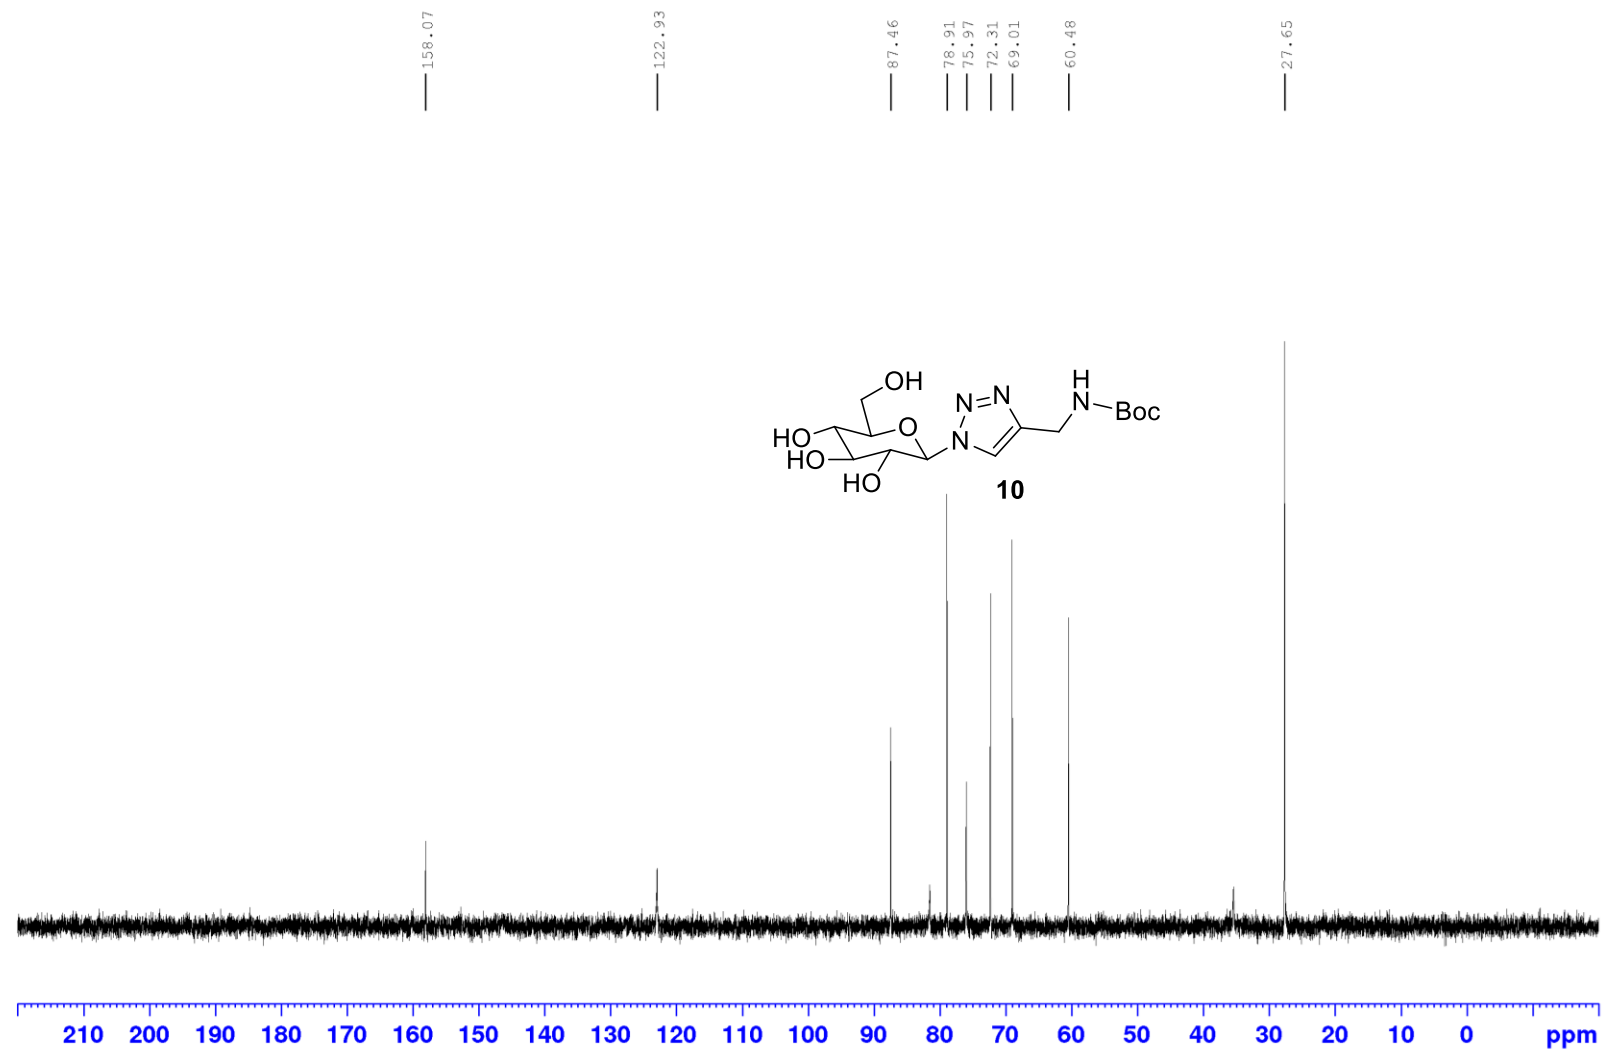

CP\_PROTON8 D2O {C:\VISTEC NMR Data\VP} vptk 16

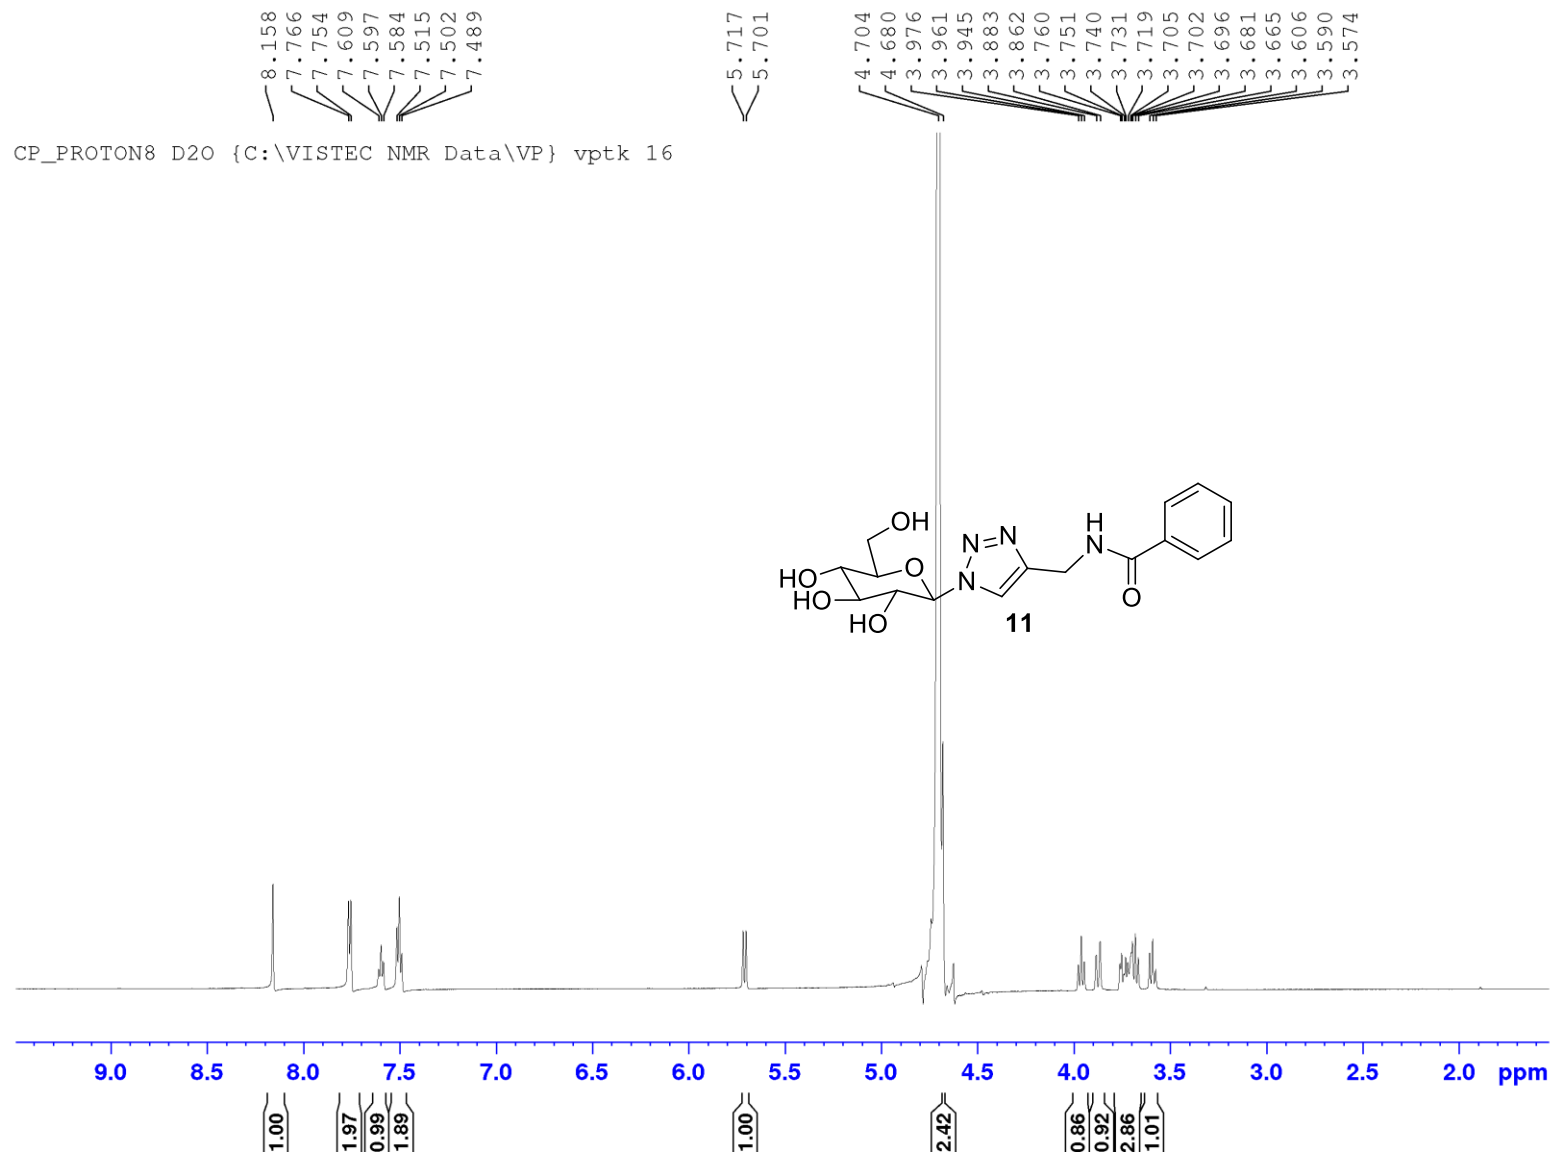

CP\_C13CPD32\_DE12 D2O {C:\VISTEC NMR Data\VP} vptk 1

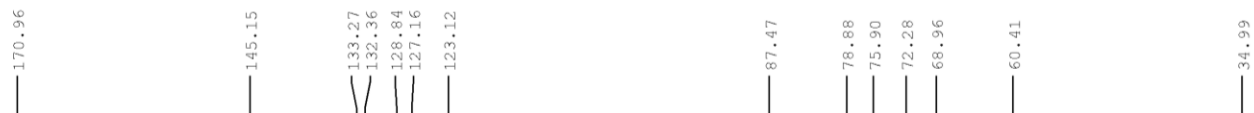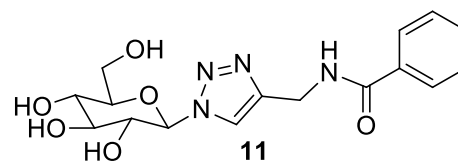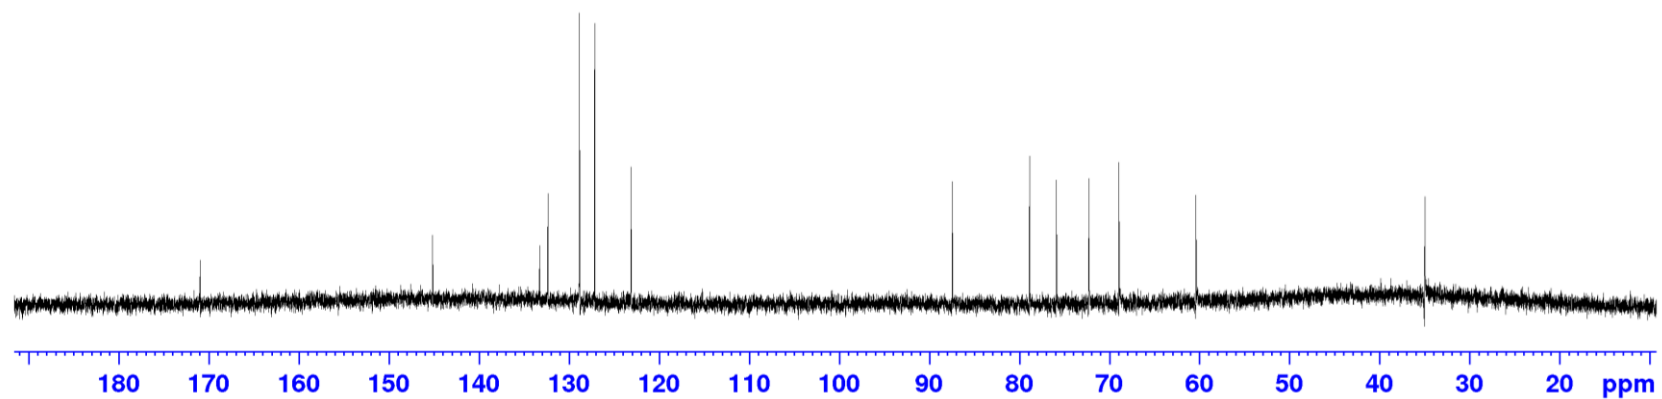



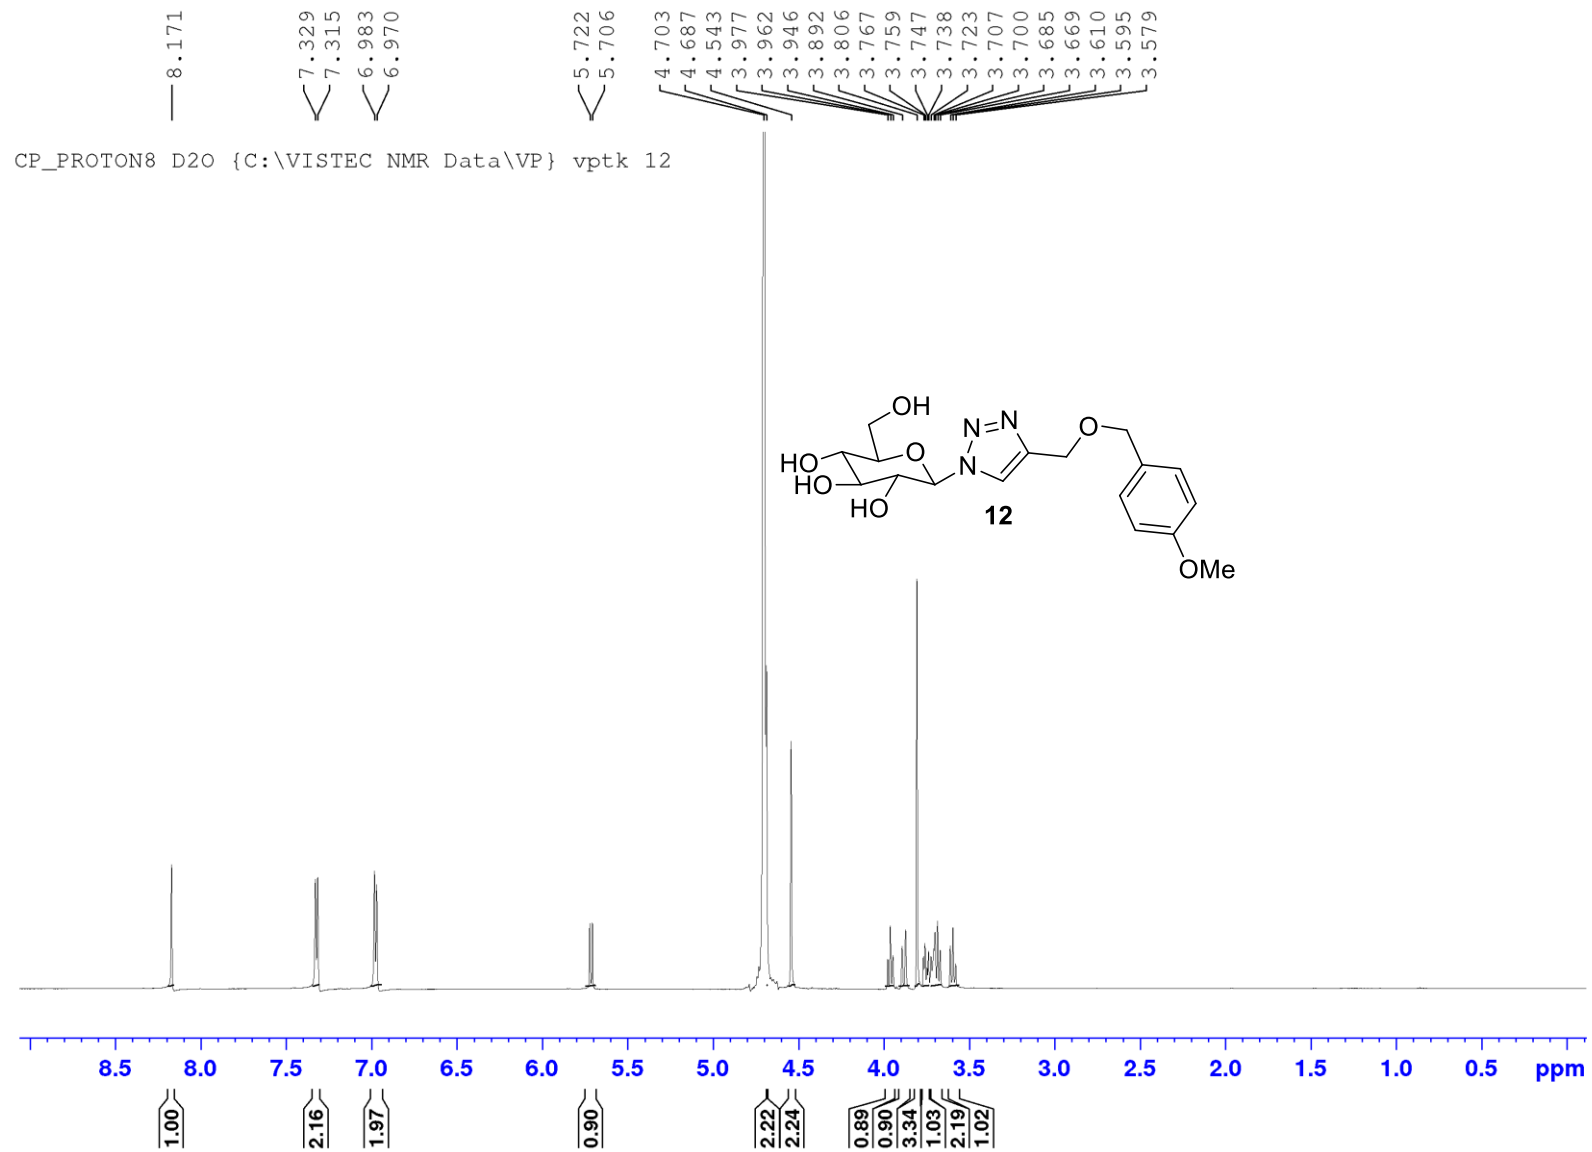

CP\_C13CPD32\_DE12 D2O {C:\VISTEC NMR Data\VP} vptk 9

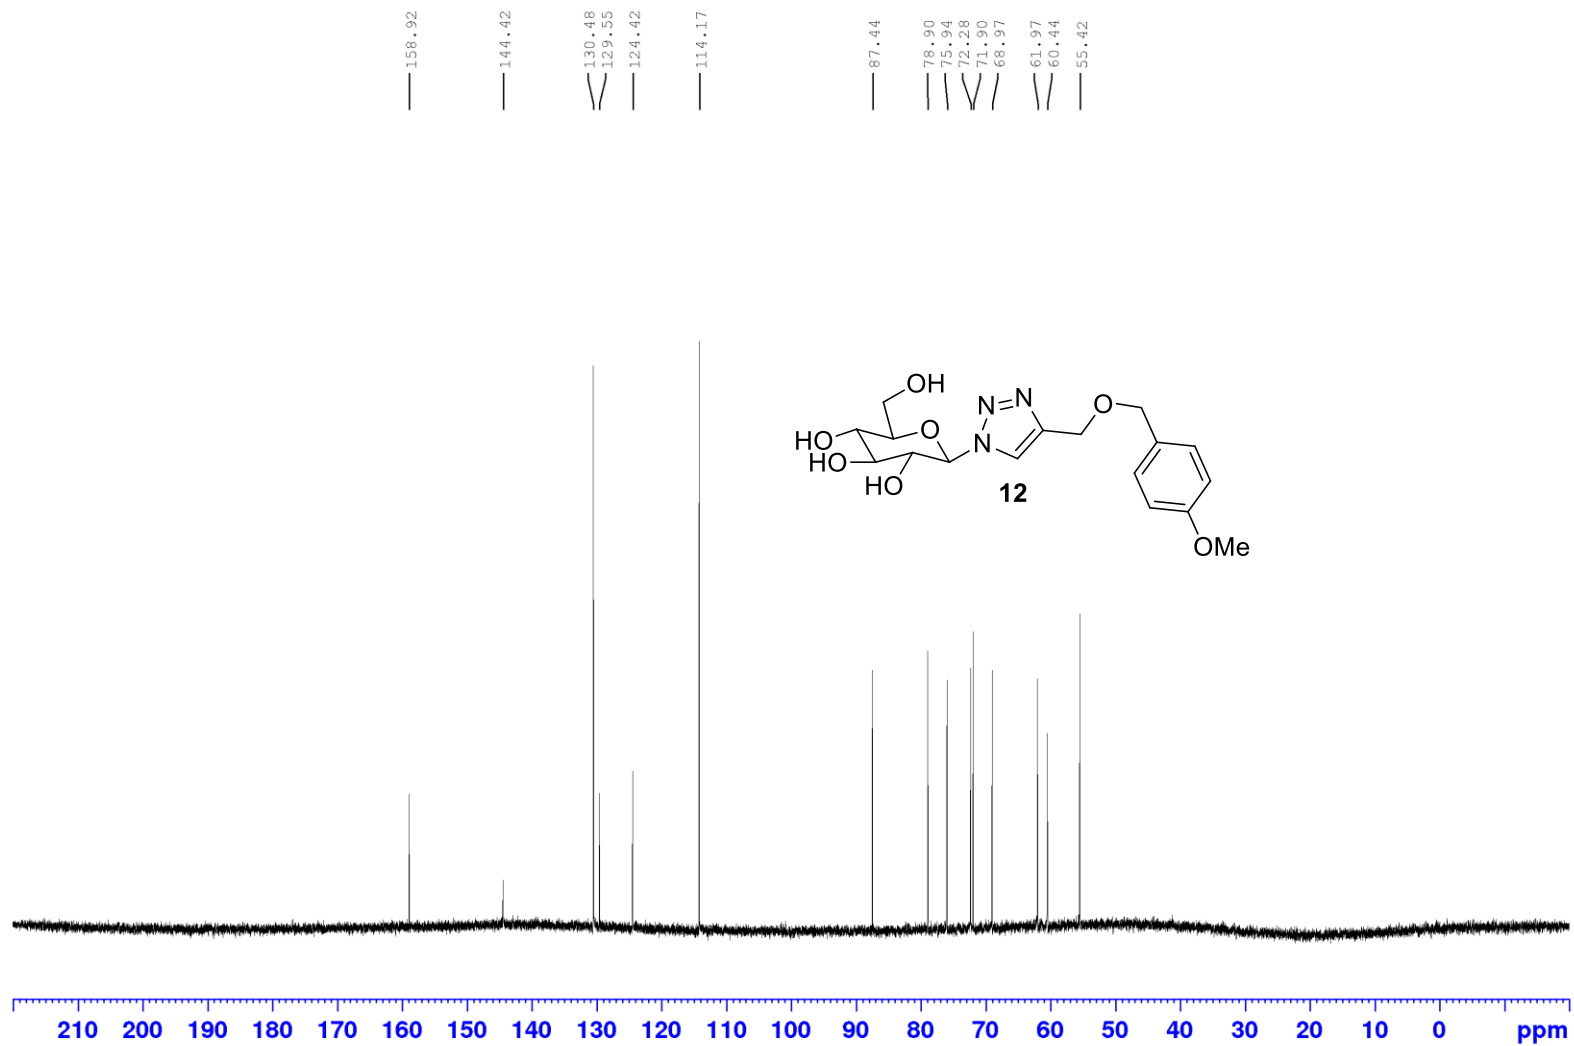

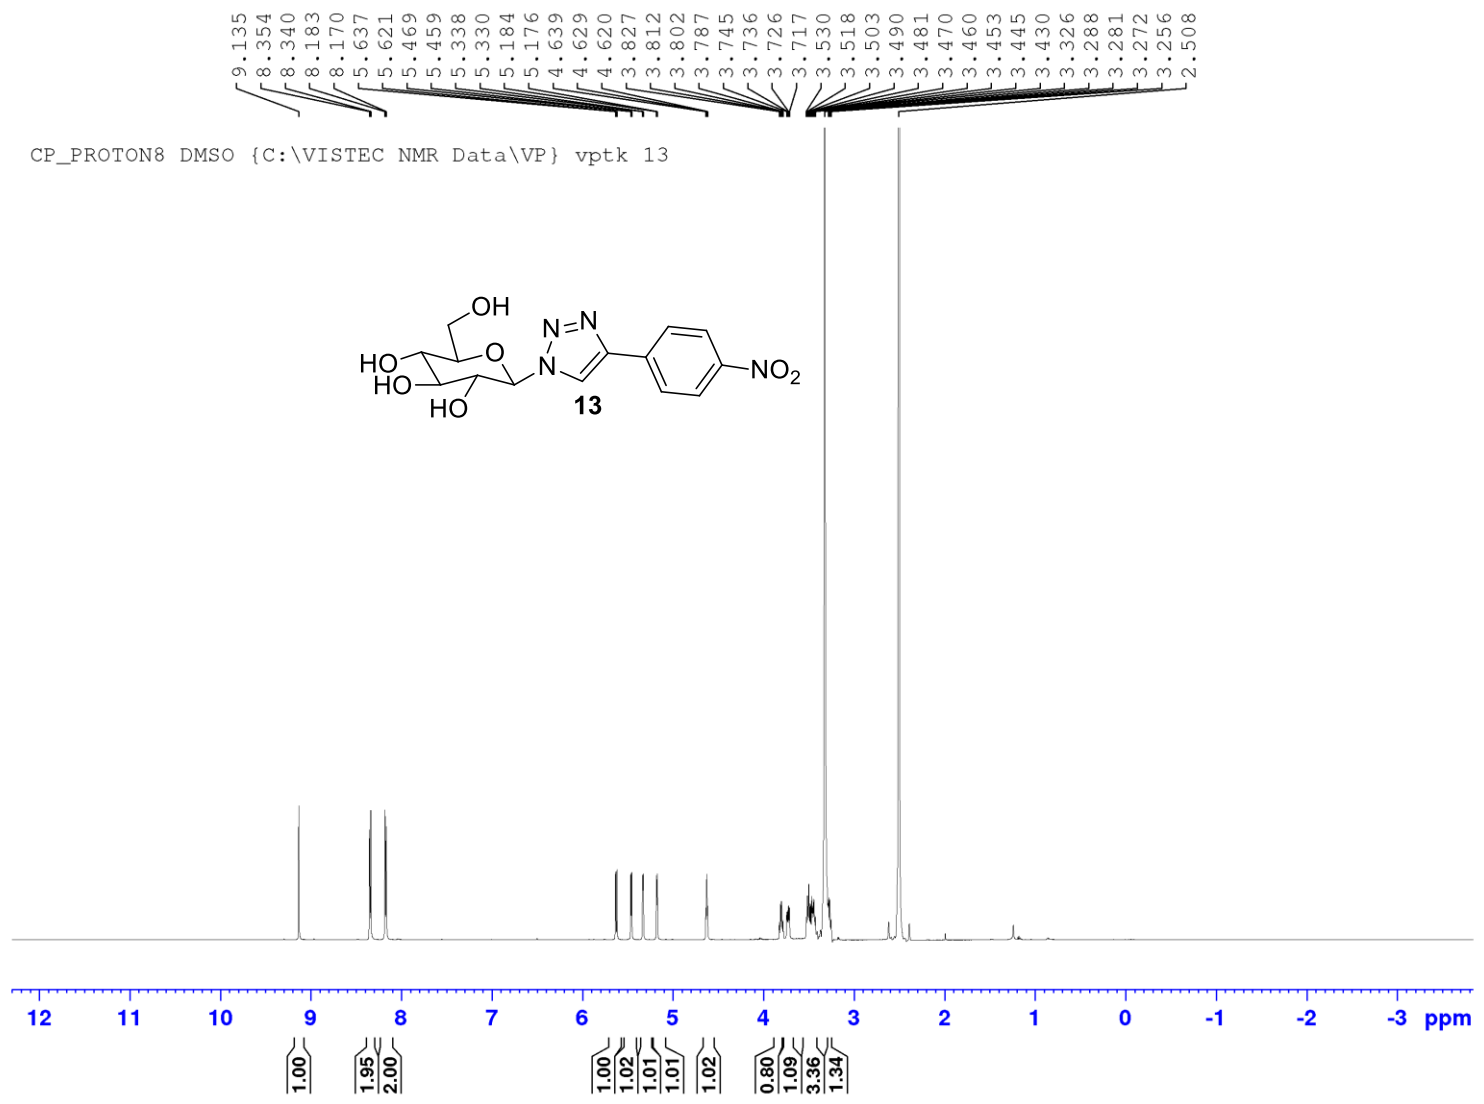

CP\_C13CPD32\_DE12 DMSO {C:\VISTEC NMR Data\VP} vptk 4

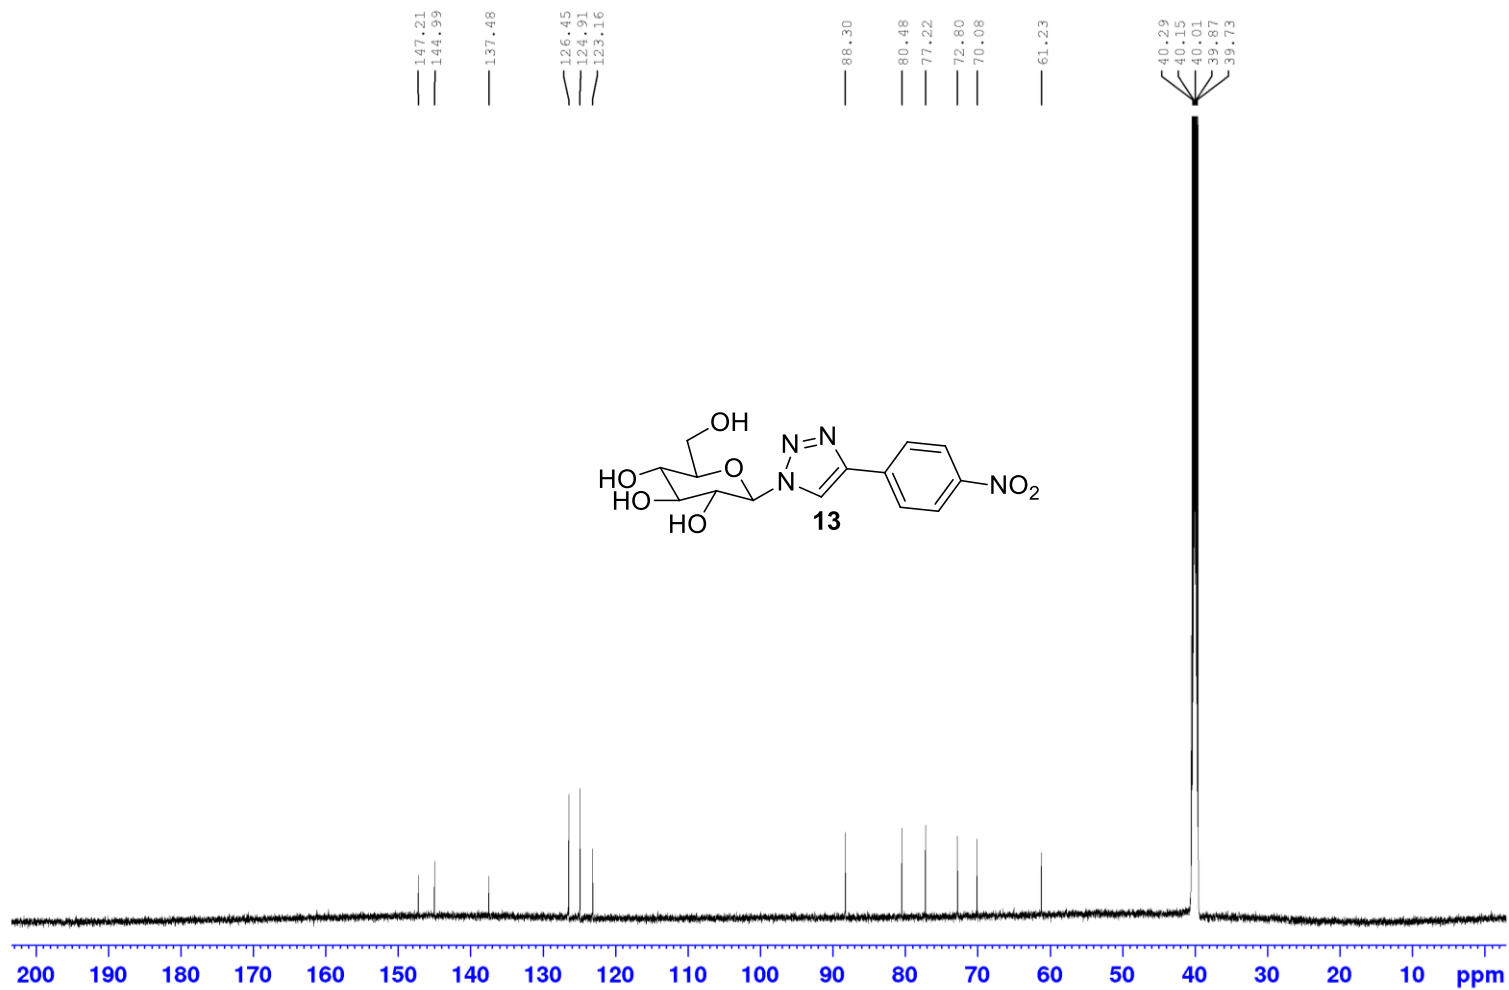

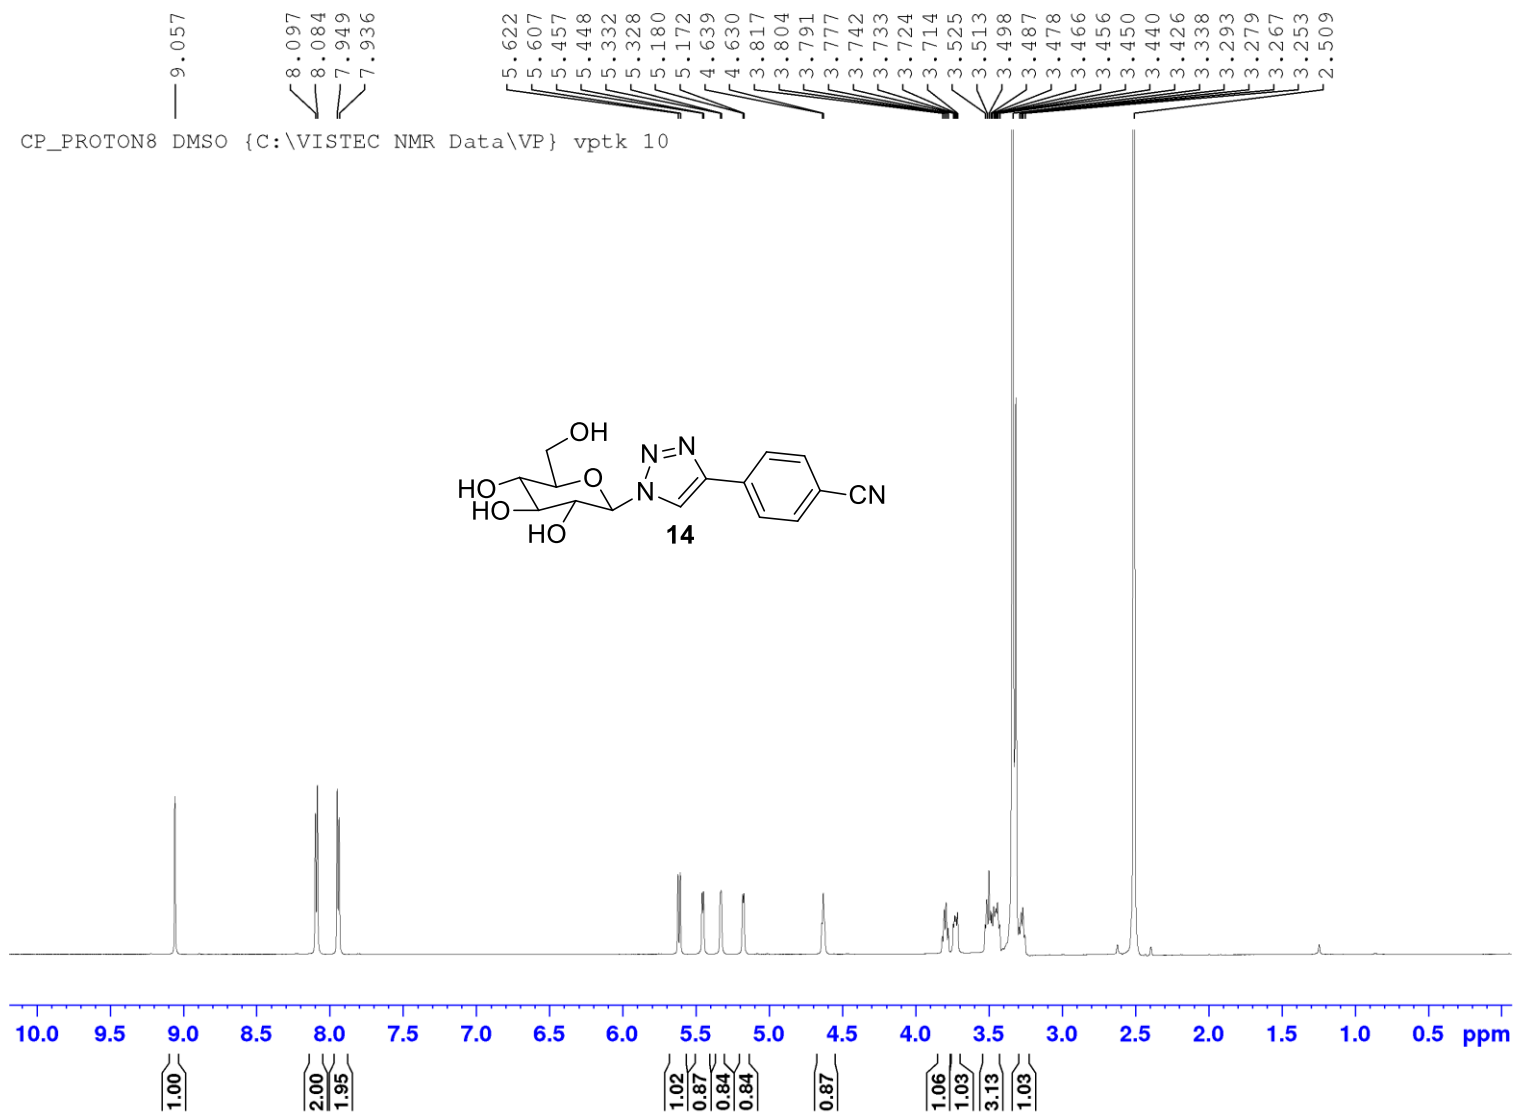

CP\_C13CPD32\_DE12 DMSO {C:\VISTEC NMR Data\VP} vptk 7

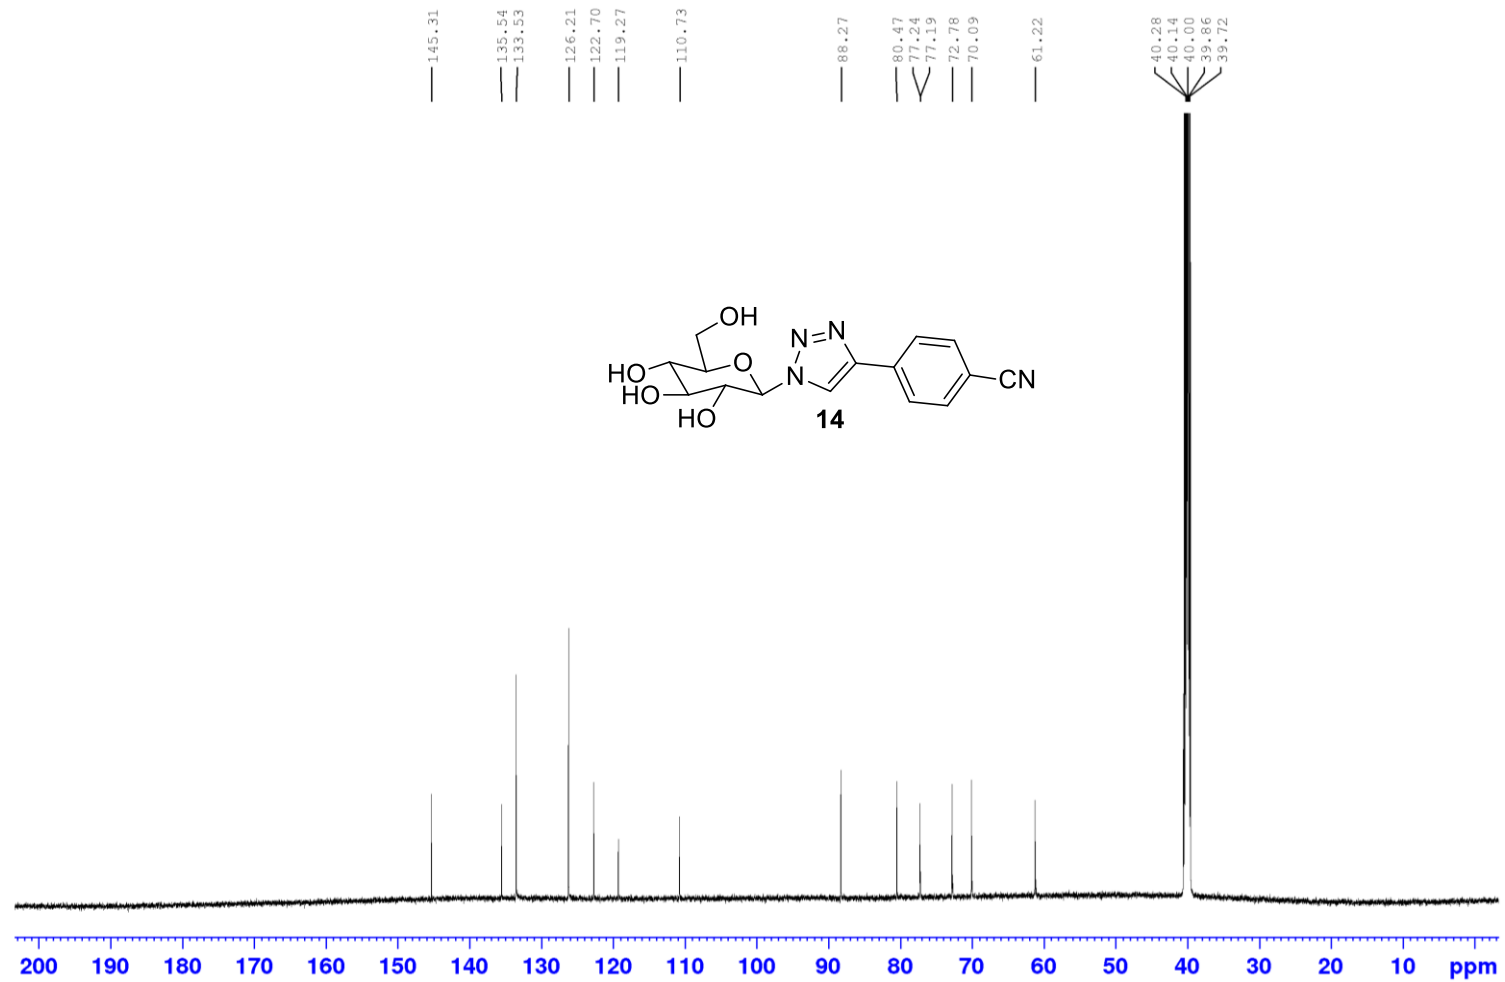

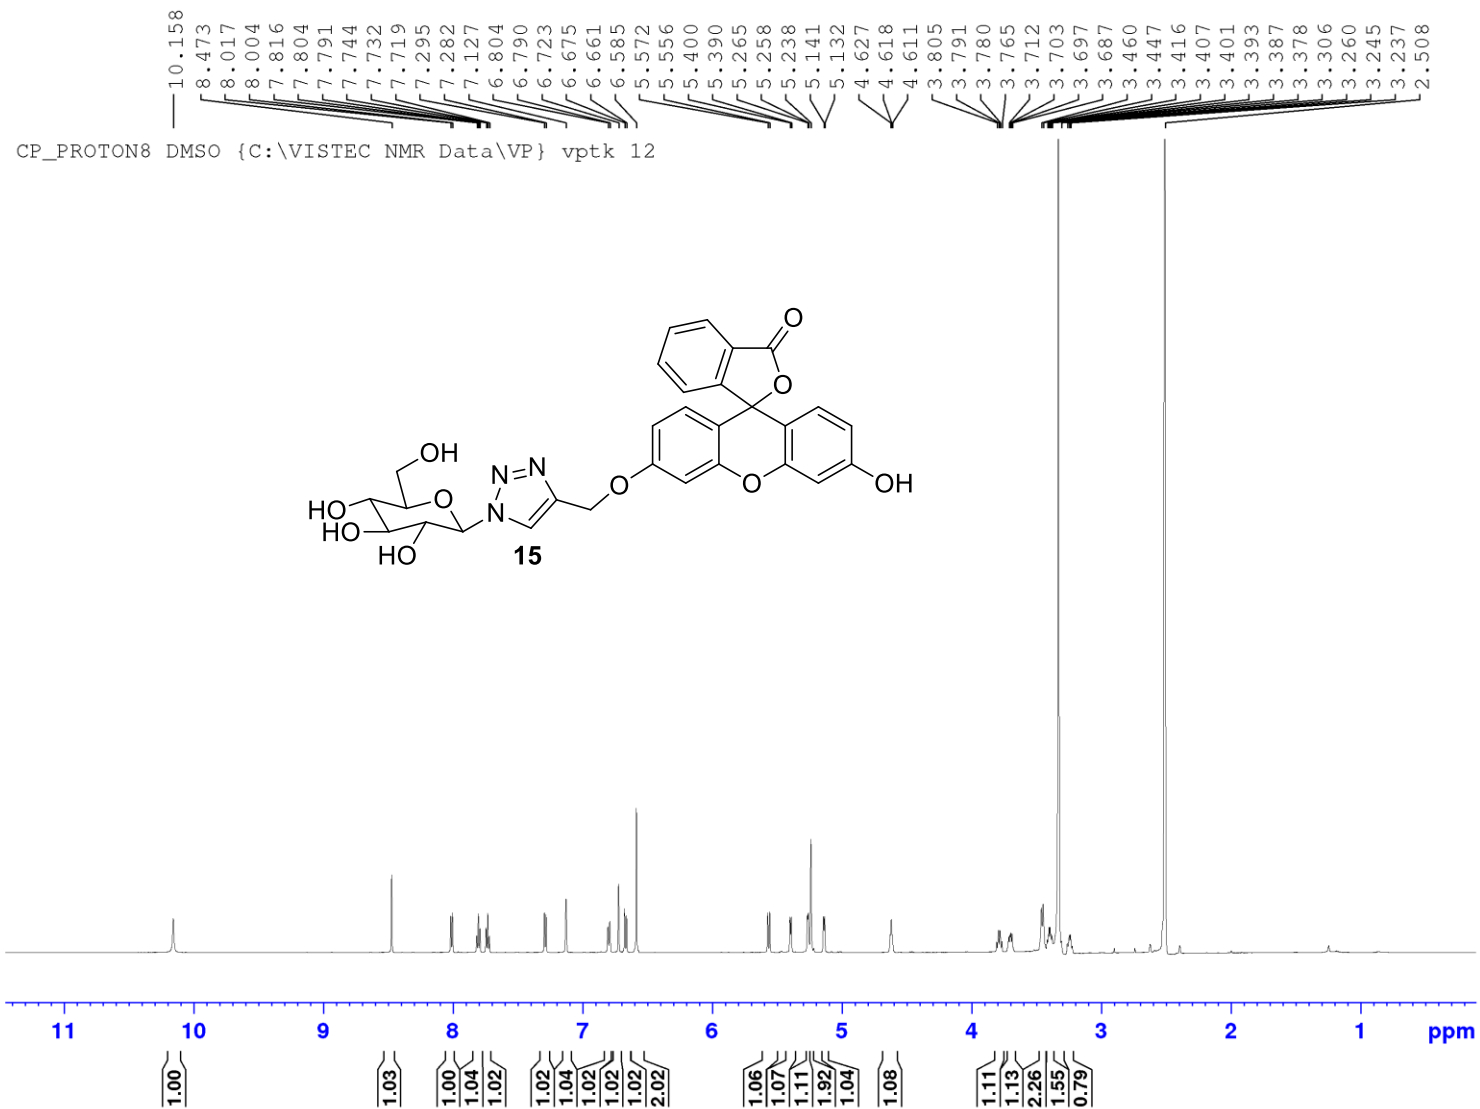

CP\_C13CPD32\_DE12 DMSO {C:\VISTEC NMR Data\VP} vptk 3

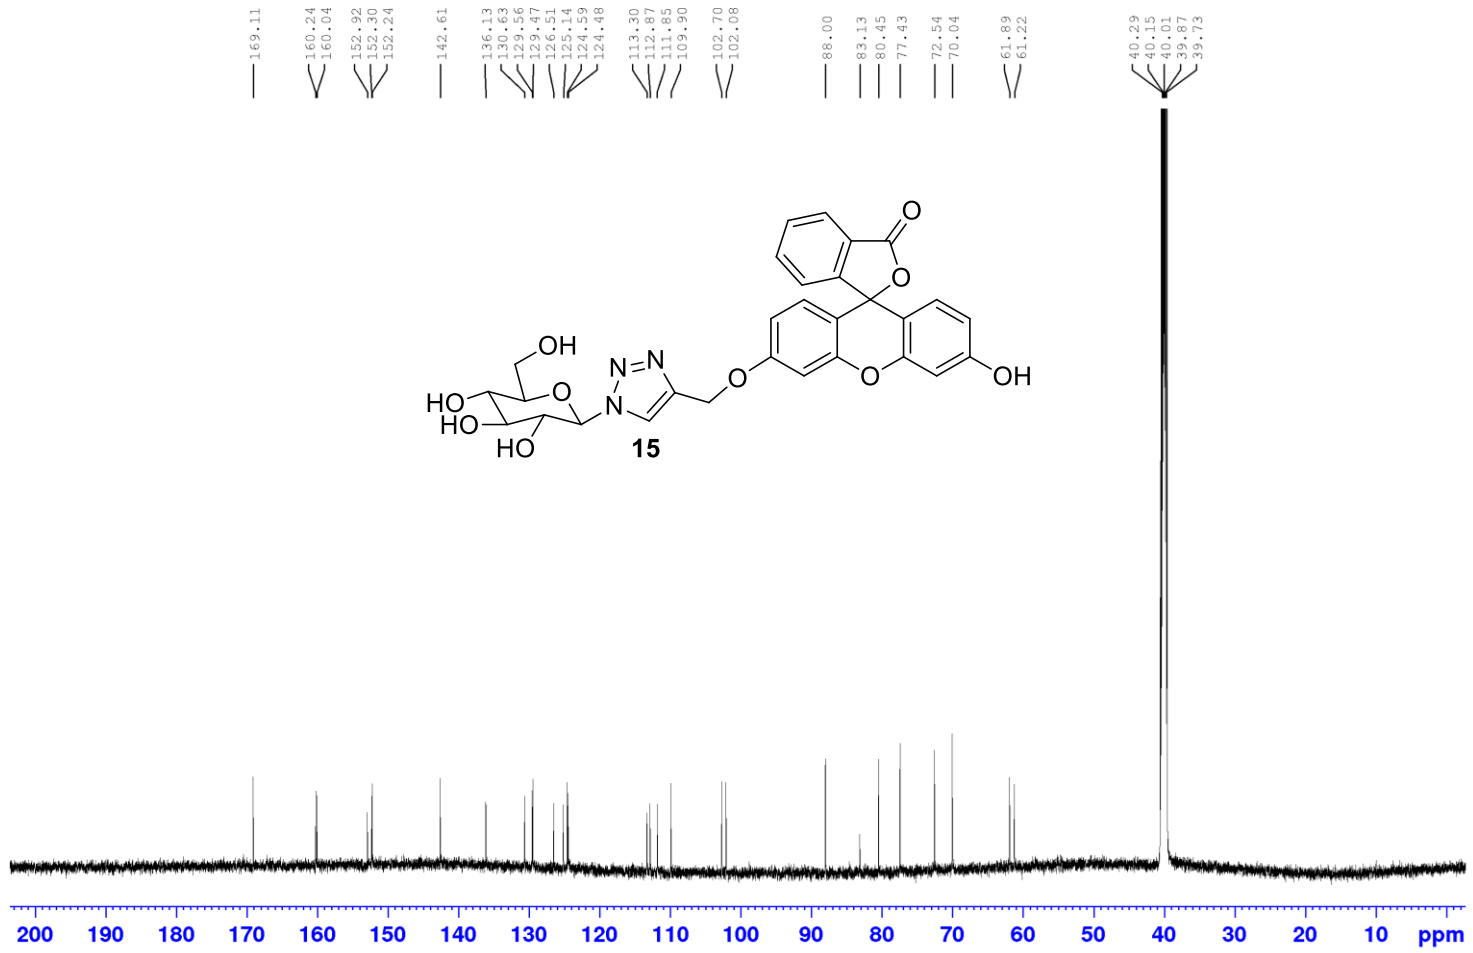



CP\_PROTON8 D2O {C:\VISTEC NMR Data\VP} vptk 10

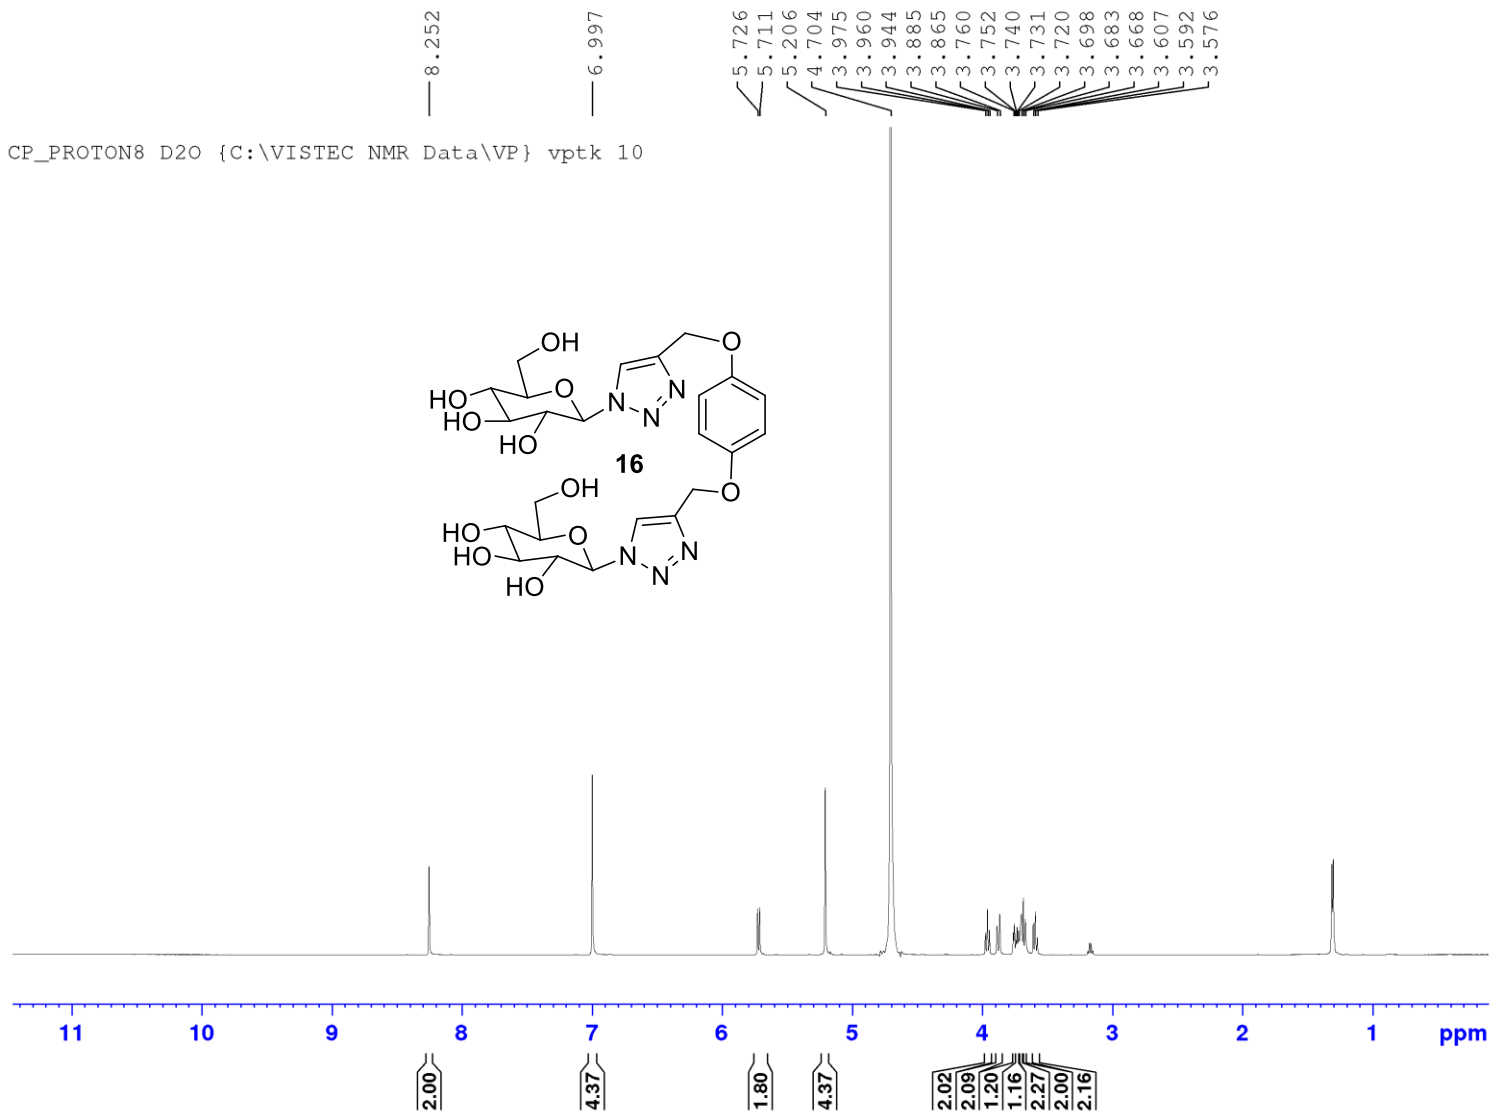

CP\_C13CPD32\_DE12 D2O {C:\VISTEC NMR Data\VP} vptk 2

152.31  
143.72  
124.52  
116.98  
87.48  
78.91  
75.93  
72.29  
68.97  
62.06  
60.43  
54.40  
42.57

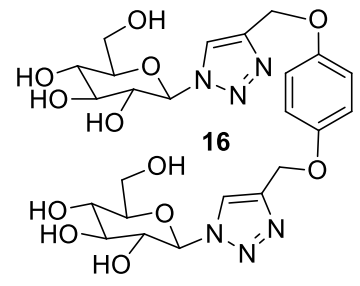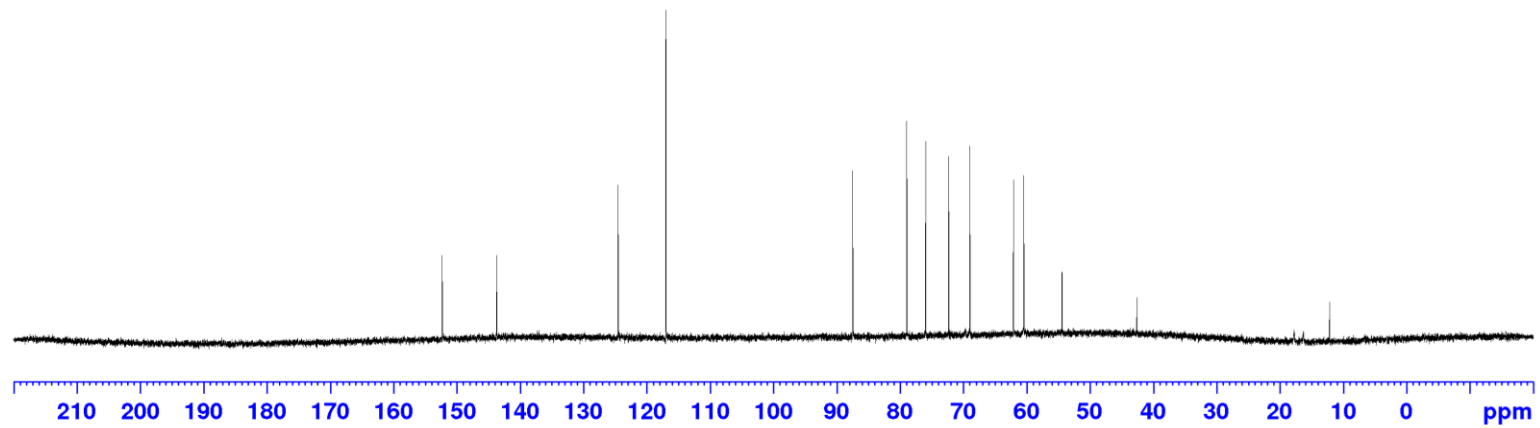

GT-16 #100 RT: 1.73 AV: 1 NL: 1.61E7  
T: FTMS (1,1) + p ESI Full lock ms [100.00-1500.00]

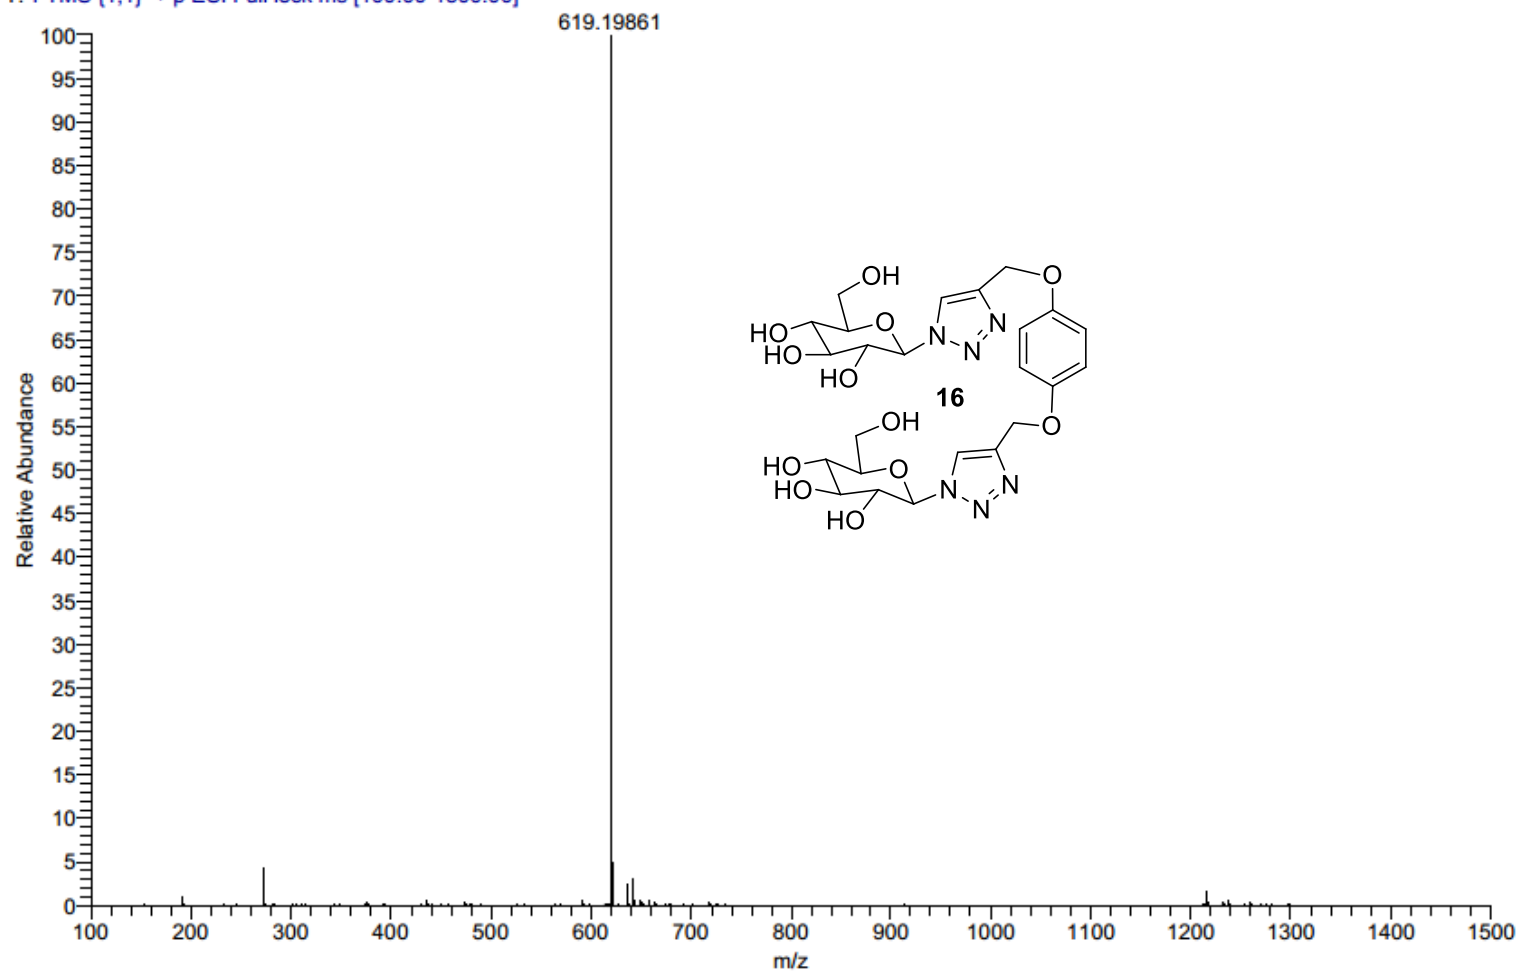

Figure S6. HR-ESI-MS Spectrum of Compound 16
